# 1 **Self-organization of kinetochore-fibers in human mitotic spindles**

2 William Conway<sup>1</sup>, Robert Kiewisz<sup>2\*</sup>, Gunar Fabig<sup>2</sup>, Colm P. Kelleher<sup>3</sup>, Hai-Yin Wu<sup>1</sup>, Maya  
3 Anjur-Dietrich<sup>4</sup>, Thomas Müller-Reichert<sup>2</sup>, Daniel Needleman<sup>3,4, 5</sup>

4 1 Department of Physics, Harvard University, Cambridge MA 02138 USA

5 2 Experimental Center, Faculty of Medicine Carl Gustav Carus, Technische Universität Dresden, 01307 Dresden, Germany

6 3 Department of Molecular and Cellular Biology, Harvard University, Cambridge, MA 02138, USA

7 4 John A. Paulson School of Engineering and Applied Sciences, Harvard University, Cambridge, MA 02138, USA

8 5 Center for Computational Biology, Flatiron Institute, New York, NY 10010, USA

9 \*Current address: Simons Machine Learning Center, New York Structural Biology Center, New York, NY 10027, USA

## 10 11 **ABSTRACT**

12  
13  
14 During eukaryotic cell division, chromosomes are linked to microtubules (MTs) in the  
15 spindle by a macromolecular complex called the kinetochore. The bound kinetochore microtubules  
16 (KMTs) are crucial to ensuring accurate chromosome segregation. Recent electron tomography  
17 reconstructions (Kiewisz et al. 2021) captured the positions and configurations of every MT in  
18 human mitotic spindles, revealing that many KMTs in these spindles do not reach the pole. Here,  
19 we investigate the processes that give rise to this distribution of KMTs using a combination of  
20 analysis of the electron tomography reconstructions, photoconversion experiments, quantitative  
21 polarized light microscopy, and biophysical modeling. Our results indicate that in metaphase,  
22 KMTs grow away from the kinetochores along well-defined trajectories, continually decreasing in  
23 speed as they approach the poles. The locations of KMT minus ends, and the turnover and  
24 movements of tubulin in KMTs, are consistent with models in which KMTs predominately  
25 nucleate de novo at kinetochores and are inconsistent with substantial numbers of non-KMTs being  
26 recruited to the kinetochore in metaphase. Taken together, this work leads to a mathematical model  
27 of the self-organization of kinetochore-fibers in human mitotic spindles.

## 28 29 **INTRODUCTION**

30  
31 When eukaryotic cells divide, a spindle composed of microtubules (MTs) and associated  
32 proteins assembles and segregates the chromosomes to the daughter cells (Strasberger et al 1880,  
33 McIntosh 2012, Heald and Khodjakov 2015, Petry et al. 2016, Prosser and Pelletier 2017, Oriola  
34 et al. 2018, Anjur-Dietrich et al. 2021). A macromolecular protein complex called the kinetochore  
35 binds each sister chromatid to MTs in the spindle thereby bi-orienting the two sisters to ensure  
36 they segregate to opposite daughter cells (McDonald et al. 1992, McEwen et al. 1997, Yoo et al.  
37 2017, Monda et al. 2018 Rieder 1982, Maiato et al. 2004b, Mussachio et al. 2017, Pesenti et al.  
38 2018, Monda and Cheeseman 2018 DeLuca et al. 2011, Redemann et al. 2017, Long et al. 2019).  
39 An MT whose plus end is embedded in the kinetochore is referred to as a kinetochore  
40 microtubule (KMT) and the collection of all KMTs associated with an individual kinetochore is  
41 called a kinetochore-fiber (K-Fiber). The kinetochore-microtubule interaction stabilizes KMTs  
42 and generates tension across the sister chromatid pair (Brinkley and Cartwright 1975, Gorbisky  
43 and Borisy 1989, Nicklas and Ward 1996, DeLuca et al. 2006, Cheeseman et al. 2006, Tanaka  
44 and Desai 2008, Akiyoshi et al 2010, Kabeche and Compton 2013, Cheerambathur et al. 2017,  
45 Monda and Cheeseman 2018, Steblyanko et al. 2020 Warren et al. 2020). Modulation of the  
46 kinetochore-microtubule interaction is thought to be important in correcting mitotic errors  
47 (DeLuca et al. 2011, Godek et al. 2015, Funabiki 2019, Long et al 2019). Kinetochore-  
48 microtubule binding is thus central to normal mitotic progression and correctly segregating sister

49 chromatids to opposite daughter cells (Cimini et al. 2001, Chiang et al. 2010, Auckland and  
50 McAinsh 2015, Lampson and Grishchuk 2017, Dudka et al. 2018). Chromosome segregation  
51 errors are implicated in a host of diseases ranging from cancer to development disorders such as  
52 Down's and Turners' Syndromes (Touati and Wassmann 2016, Compton 2017, Jo et al 2021).

53 The lifecycle of a KMT consists of its recruitment to the kinetochore, its subsequent  
54 motion, polymerization and depolymerization, and its eventual detachment from the kinetochore.  
55 The initial recruitment of an MT to the kinetochore can either occur by a non-KMT being  
56 captured by the kinetochore, or by de-novo nucleation of a KMT at the kinetochore (Telzer et al.  
57 1975, Mitchinson and Kirschner 1985a, Mitchinson and Kirschner 1985b, Huitorel and  
58 Kirschner 1988, Heald and Khodjakov 2015, LaFountain and Oldenborug 2014, Petry 2016,  
59 Sikirzhyski et al. 2018, David et al. 2019, Renda and Khodjakov 2021). The relative importance  
60 of these two pathways throughout mitosis in human cells remains unknown. The plus-ends of  
61 KMTs can polymerize and depolymerize while remaining attached to the kinetochore, leading to  
62 a net flux of tubulin through the K-Fiber from the kinetochore towards the spindle pole (Rieder  
63 and Alexander 1990, Mitchinson and Salmon 1992, Zhai et al. 1995, Waters et al. 1996,  
64 Khodjakov et al. 2003, Gabbe and Heald 2004, McIntosh et al. 2012, Steblyanko et al. 2020,  
65 DeLuca et al. 2011, Elting et al. 2014, Elting et al. 2017, Neahring et al. 2021, Risteski et al.  
66 2021). For human cells in metaphase, it is unclear to what extent these motions are due to  
67 movement of entire K-Fibers, movement of individual KMTs within a K-Fiber, or movement of  
68 tubulin through individual KMTs. Finally, when KMTs detach from the kinetochore, they  
69 become non-KMTs by definition. The regulation of KMT detachments is thought to be important  
70 for correcting improper attachments and ensuring accurate chromosome segregation (Tanaka et  
71 al. 2002, Bakhom et al. 2009, DeLuca et al. 2011, Godek et al. 2015, Krenn and Mussachio  
72 2015, Lampson and Grishuk 2017, Funabiki 2019, Long et al 2019,). KMT detachments  
73 typically occur with a time scale of ~5 mins in metaphase in human mitotic cells (Kabeche and  
74 Compton 2013). How these processes – KMT recruitment, motion, polymerization and  
75 depolymerization, and detachment – lead to the self-organization of K-Fibers remains  
76 incompletely understood.

77 In a companion paper, we used serial-section electron tomography to reconstruct the  
78 locations, lengths, and configurations of MTs in metaphase spindles in HeLa cells (Kiewisz et al  
79 2021). These whole spindle reconstructions can unambiguously identify which MTs are bound to  
80 the kinetochore and measure their lengths, providing a remarkable new tool for the study of  
81 KMTs. Strikingly, many KMTs do not reach all the way to the pole. Here, we sought to combine  
82 the electron tomography spindle reconstructions with live-cell experiments and biophysical  
83 modeling to characterize the lifecycle of KMTs in metaphase spindles in HeLa cells. The  
84 electron tomography reconstructions revealed that only ~50% of KMTs have their minus ends at  
85 spindle poles. We used photoconversion experiments to measure the dynamics of KMTs, which  
86 revealed that while their stability does not spatially vary, their speed is greatest in the middle of  
87 the spindle and continually decreases closer to poles. We next show that the orientations of MTs  
88 throughout the spindle, measured by electron tomography and polarized light microscopy, can be  
89 quantitatively explained by an active liquid crystal theory in which the mutual interactions  
90 between MTs cause them to locally align with each other. This argues that KMTs tend to move  
91 along well-defined trajectories in the spindle. We show that the distribution of KMT minus ends  
92 along these trajectories (measured by electron tomography) is only consistent with the motion  
93 and turnover of KMTs (measured by photoconversion) if KMTs predominately nucleate at  
94 kinetochores. Taken together, these results lead us to construct a model in which KMTs nucleate

95 at the kinetochore, grow and slow down as they move along their trajectories toward poles,  
96 undergo minus end depolymerization near the pole and detach from the kinetochore at a constant  
97 rate. Such a model of K-Fiber self-organization can quantitatively explain the lengths, locations,  
98 configurations, motions, and turnover of KMTs throughout metaphase spindles in HeLa cells.

99

## 100 **RESULTS**

101

### 102 **Many KMT minus ends are not at the pole**

103 We first analyzed a recent cellular tomography electron microscopy (EM) reconstruction  
104 data set which captured the trajectories of every MT in the mitotic spindle of three HeLa cells  
105 (Kiewisz et al., 2021). We defined KMTs as MTs with one end near a kinetochore in the  
106 reconstructions and assigned the plus end to the end at the kinetochore and the minus end to the  
107 opposite end of the MT (Figure 1A). KMT minus ends are located throughout the spindle, with  
108 approximately 51% of them more than 1.5 $\mu$ m away from the pole (Figure 1B). KMT minus ends  
109 are distributed throughout individual K-Fibers (Figure 1C), indicating that the processes that lead  
110 to a broad distribution of KMT minus end locations can occur at the level of individual  
111 kinetochores. We wanted to know how the observed distribution of KMT minus end locations  
112 results from the behaviors of KMTs. This requires understanding the life cycle of a metaphase  
113 KMT, namely (Figure 1D):

- 114 1. How are KMTs recruited to kinetochores? To what extent are they nucleated de novo at  
115 the kinetochore vs. resulting from non-KMTs being captured from the bulk of the spindle?
- 116 2. How do KMTs move and grow? What are their growth trajectories and the minus end  
117 speeds?
- 118 3. How do KMTs detach from kinetochores?

119 We sought to answer these questions with a series of live-cell experiments, further analysis of the  
120 spindle reconstructions obtained from electron tomography, and mathematical modeling.

121

### 122 **The fraction of slow-turnover tubulin measured by photoactivation matches the fraction of 123 tubulin in KMTs measured by electron tomography**

124 To understand how the motion and turnover of KMTs results in the observed ultrastructure,  
125 we first sought to characterize the motion and stability of KMTs throughout the spindle. To that  
126 end, we constructed a HeLa line stably expressing CENP-A:GFP to mark kinetochores and  
127 mEOS3.2: $\alpha$  tubulin to mark MTs. After photoconverting a line of tubulin in the spindle, the  
128 converted tubulin moves poleward and fades over time (Figure 2A) (Mitchinson 1989, DeLuca  
129 2010, Kabeche and Compton 2013, Yu et al. 2019, Steblyanko et al. 2020).

130 To measure the speed and turnover of MTs, we first projected the intensity of the  
131 photoconverted tubulin onto the spindle axis (Figure 2B) (Kabeche and Compton 2013). We then  
132 fit the resulting peak to a Gaussian to track the motion of its center position and decay of its height  
133 over time (Figure 2C). We fit the position of the peak center over time to a line to determine the  
134 speed of tubulin movement in the spindle (Figure 2D). We then corrected the peak heights for  
135 bleaching by dividing by a bleaching reference (Figure 2s1) and fit the resulting time course to a  
136 dual-exponential decay to measure the tubulin turnover dynamics (Figure 2E) (DeLuca 2010).

137 Since the tubulin turnover is well-fit by a dual-exponential decay, it suggests that there are  
138 two subpopulations of MTs with different stabilities in the spindle, as previously argued for many  
139 model systems (Brinkley 1975, Salmon et al. 1976, Lambert and Bajer 1977, Rieder and Bajer  
140 1977, Rieder 1981, Cassimeris et al. 1990, DeLuca et al. 2010). In prior studies, the slow-turnover

141 subpopulation has typically been ascribed to the KMTs, while the fast-turnover subpopulation has  
142 typically been ascribed to the non-KMTs (Zhai et al. 1995, DeLuca 2010, Kabeche and Compton  
143 2013). However, it is hypothetically possible that a portion of non-KMTs are also stabilized, due  
144 to bundling or some other mechanism (Tipton et al. 2021). To gain insight into this issue, we  
145 generated a cell line with SNAP-centrin to mark the poles and mEOS3.2:alpha tubulin to mark  
146 MTs and performed photoconversion experiments on a total of 70 spindles. We compared the  
147 fraction of tubulin in KMTs,  $25\pm 2\%$  ( $n = 3$ ), measured by electron tomography (in which a KMT  
148 is defined morphologically as a MT with one end embedded in a kinetochore; Figure 2F; Kiewisz,  
149 et al., 2021) to the fraction of the slow-turnover subpopulation measured from photoconversion  
150 experiments,  $24\pm 2\%$  ( $n = 70$ ). Since these two fractions are statistically indistinguishable (Figure  
151 2G,  $p=0.92$  on a Student's t-test), we conclude that the slow-turnover subpopulation are indeed  
152 KMTs, and that there is not a significant number of stabilized non-KMTs.

153

### 154 **KMT speed is spatially varying while both KMT and non-KMT stability are uniform in the** 155 **spindle bulk**

156 We next explored the extent to which the speed and stability of MTs changed throughout  
157 the spindle (Burbank et al. 2007, Yang et al. 2008). To do this, we compared photoconversion  
158 results from lines drawn at different position along the spindle axis. After photoconverting close  
159 to the center of the spindle ( $\sim 4.5\mu\text{m}$  from the pole), the resulting line of marked tubulin migrated  
160 towards the pole (Figure 3A). This poleward motion was less evident when we photoconverted a  
161 line halfway between the kinetochores and the pole (Figure 3B), and barely visible when we  
162 photoconverted a line near the pole itself (Figure 3C). Tracking the subsequent motions of these  
163 photoconverted lines in different regions revealed clear differences in their speeds (Figure 3D),  
164 while their turnover appeared to be similar (Figure 3E). To quantitatively study this phenomenon,  
165 we photoconverted lines in 74 different spindles, at various distances from the pole and measured  
166 the speed and turnover times at each location. Combining data from these different spindles  
167 revealed that average speed of the photoconverted lines increased with increasing distance from  
168 the pole (Figure 3F; Slope= $0.20\pm 0.07(\mu\text{m}/\text{min})/\mu\text{m}$ ,  $p=0.004$ ), while both the KMT (Figure 3G;  
169 Slope= $-0.03\pm 0.05(1/\text{min})/\mu\text{m}$ ,  $p=0.23$ ) and non-KMT (Figure 3H; Slope= $0.0\pm 0.2(1/\text{min})/\mu\text{m}$ ,  
170  $p=0.44$ ) turnover were independent of distance from the pole. These results suggest that the speed  
171 of the KMTs is faster the further they are from the pole, and that the stability of KMTs and non-  
172 KMTs are constant throughout the spindle.

173

### 174 **KMTs and non-KMTs are well aligned in the spindle**

175 To connect the static ultrastructure of KMTs (visualized by electron tomography) to the  
176 spatially varying KMT speeds (measured by photoconversion), we next sought to better  
177 characterize the orientation and alignment of MTs in the spindle. We started by separately  
178 analyzing the non-KMTs and KMTs (Figure 4A) in all three electron tomography reconstructions  
179 (Figs 4s1,4s2), and found that all MTs overwhelmingly lie on trajectories in the spindle axis-radial  
180 axis plane (Figure 4s3). We therefore projected all MTs into this plane and calculated the average  
181 orientation,  $\langle\theta\rangle$ , in the spindle for both non-KMTs (Figure 4B) and KMTs (Figure 4C). The  
182 orientations of non-KMTs and KMTs were very similar to each other throughout the spindle, as  
183 can be seen by comparing the mean orientation of both sets of MTs along the spindle axis (Figure  
184 4D). Thus, the non-KMTs and KMTs align along the same orientation field in the spindle.

185 The above analysis addresses how the average orientation of MTs varies throughout the  
186 spindle. We next sought to quantify the degree to which MTs are well aligned along these average

187 orientations. This is conveniently achieved by calculating the scalar nematic order parameter,  $S =$   
188  $3/2 \langle \cos^2(\theta - \langle \theta \rangle) - 1 \rangle$ , which would be 1 for perfectly aligned MTs and 0 for randomly ordered  
189 MTs (de Gennes and Prost 1993). We calculated  $S$  for both non-KMTs (Figure 4E) and KMTs  
190 (Figure 4F) throughout the spindle. Both sets of MTs are well aligned throughout the spindle  
191 (Figure 4G) with  $\langle S \rangle = 0.90 \pm 0.01$  for KMTs and  $\langle S \rangle = 0.78 \pm 0.01$  for non-KMTs. The strong  
192 alignment of MTs in the spindle along the (spatially varying) average orientation field suggests  
193 that MTs in the spindle tend to move and grow along this orientation field.

194 We next calculated the orientation field of MTs in Hela spindles by averaging together data  
195 from both non-KMTs and KMTs from all three EM reconstructions by rescaling each spindle to  
196 have the same pole-pole distance and radial width (Figure 5A). We sought to test if the resulting  
197 orientation field was representative by obtaining data on additional Hela spindles. Performing  
198 significantly more large-scale EM reconstructions is prohibitively time consuming, so we turned  
199 to an alternative technique: the LC-Polscope, a form of polarized light microscopy that can  
200 quantitatively measure the optical slow axis (i.e. the average MT orientation) with optical resolution  
201 (Oldenbourg et al. 1998) We averaged together live-cell LC-Polscope data from eleven Hela  
202 spindles and obtained an orientational field (Figure 5B) that looked remarkably similar to the one  
203 measured by EM (compare Figure 5A and 5B).

204 Previous work has shown that the internal dynamics and orientation of MTs in *Xenopus*  
205 egg extract spindles can be quantitatively explained by an active liquid crystal theory (Brugués and  
206 Needleman 2014, Oriola et al. 2020). In this theory, the morphology of the spindle results from  
207 the local interactions of MTs with each other (mediated by molecular motors and other cross-  
208 linkers), which cause MTs to locally align relative to each other. A remarkable prediction of this  
209 theory is that the orientations of MTs in the spindle satisfy Laplace's equation,  $\nabla^2 \theta = 0$ , where  $\theta$   
210 is the average local orientation of MTs. Thus, this theory predicts that the orientations of MTs  
211 throughout the spindle are completely determined by the spindle's boundary and topological  
212 defects and, once those are specified, do not depend on parameters, such as those representing the  
213 MTs interactions or dynamics. We tested if this same framework can accurately describe Hela  
214 spindles by calculating the expected MT orientation field with tangential anchoring at the spindle  
215 boundary. In this calculation we adjusted the location and size of the two point defects, with a best  
216 fit placing them near the centrosomes as expected (Figure 5C). The theoretically predicted  
217 orientation field is remarkably similar to the orientation fields experimentally measured with EM  
218 and LC-Polscope (Figure 5D). Displacing the point defects to alternative locations, such as at the  
219 spindle periphery, results in substantially worse fits (Figure 5S1).

220 The agreement between the active liquid crystal theory, EM and LC-Polscope argues that  
221 the orientation of MTs in Hela spindles are determined by MTs locally interacting with each other.  
222 This, in turn, suggests that MTs in Hela spindles tend to grow and move along the direction set by  
223 the orientation field.

## 224 **The distribution of KMT minus ends along streamlines constrains models of KMT** 225 **behaviors**

226 We next explored in more detail the implication that KMTs grow and move along the  
227 orientation field of the spindle. If the trajectories of KMTs are confined to lie along the orientation  
228 field, then their minus ends will trace out paths on streamlines which lie tangent to the director  
229 field as they move towards the pole. We define a coordinate  $s$  as the distance from the pole along  
230 the streamlines, with  $s = 0$  at the pole itself for all streamlines. We started by considering the  
231 locations of KMT minus ends on such streamlines. For each of the three individual reconstructed  
232

233 spindles, we fit the average MT orientations to the director field predicted by the active liquid  
234 crystal theory with two point defects and tangential anchoring along the spindle boundary (Figure  
235 6s1). Then, for each KMT in each spindle, we integrated the fit director field from the KMT's  
236 minus end to the associated spindle pole to find the streamline trajectory and calculated the  
237 corresponding location as the arc length along that streamline (Figure 6A). We combined data  
238 from the three electron tomography reconstructions to construct the density distribution along  
239 streamlines of KMT minus ends whose plus ends were upstream of that position (Figure 6B, see  
240 modeling supplement). This distribution peaks roughly 1 $\mu$ m away from the pole and is flat in the  
241 spindle bulk.

242 The assumption that KMTs lie along streamlines suggests that this distribution of KMT  
243 minus ends results from the balance of three processes (Figure 6C): 1) If a non-KMT whose minus  
244 end is at position  $s$  along a streamline grows such that its plus end binds a kinetochore, then that  
245 non-KMT is recruited to become a KMT. This results in the addition of a new KMT minus end  
246 appearing at position  $s$ , which occurs with a rate  $j(s)$ ; 2) Microtubule minus ends move towards  
247 the pole with a speed,  $v(s)$ , that may vary with position along the streamline; 3) When a KMT  
248 whose minus end is at position  $s$  along a streamline detaches from the kinetochore it becomes a  
249 non-KMT (by definition). This results in the loss of a KMT minus end at position  $s$ , which occurs  
250 at a rate  $r$ . The observation that the turnover rates of KMTs, as measured by photoactivation, is  
251 uniform throughout the bulk of the spindle (Figure 3G) argues that the detachment rate,  $r$  does not  
252 depend on the position along a streamline.

253 If the measured distribution of KMT minus ends (Figure 6B) is at steady-state, then the  
254 fluxes from the three processes described above – gain, movement, and loss – must balance at all  
255 locations along streamlines (Figure 6C), leading to:

$$256 \quad j(s) + v(s) \frac{dn}{ds} + \frac{dv}{ds} n(s) - rn(s) = 0 \quad (\text{Eq 1})$$

257 Where  $n(s)$ , is the density of KMT minus ends at position  $s$ , and  $v(s) \frac{dn}{ds} + \frac{dv}{ds} n(s)$  is the flux that  
258 results from the difference between KMT minus ends moving in and out of position  $s$ . Thus, Eq.  
259 1 specifies a relationship between the distribution of KMT minus ends,  $n(s)$ , the spatially varying  
260 speed of KMT minus ends,  $v(s)$ , and rate at which KMTs are recruited,  $j(s)$ . This relationship  
261 suggests a means to experimentally test models of KMT recruitment: since we directly measured  
262  $n(s)$  by electron microscopy (i.e. Figure 6B), postulating a form  $j(s)$  allows  $v(s)$  to be calculated.  
263 The predicted  $v(s)$  can then be compared with measured KMT movements (Figure 3) to determine  
264 the extent to which it, and thus the postulated  $j(s)$ , are consistent with both the electron microscopy  
265 and photoconversion data. This prediction requires specifying the rate of KMT detachment, which,  
266 based on our photoconversion measurements, we take to be  $r = 0.4 \text{ min}^{-1}$ .

267 We consider two models of KMT recruitment that have previously been proposed, either  
268 that KMTs are nucleated at kinetochores (Witt et al. 1980, Mitchinson and Kirschner 1985a,  
269 , Khodjakov et al. 2000, Khodjakov et al. 2003, Maiatio et al. 2004, Sikirzhyski et al. 2018) or  
270 that KMTs arise from non-KMTs whose plus ends are captured by kinetochores (Mitchinson and  
271 Kirschner 1984, 1985b, 1986, Huitorel and Kirschner 1988, Rider and Alexander 1990, Hayden et  
272 al. 1990, Kamasaki et al. 2013, David et al. 2019). If all KMTs were nucleated at kinetochores,  
273 then  $j(s) = 0$  everywhere in the spindle bulk (Figure 6D, upper). These “kinetochore-nucleated”  
274 KMTs could either be nucleated by the kinetochore itself or could be nucleated nearby and  
275 captured while still near zero length (Sikirzhyski et al. 2018). If instead all KMTs result from the  
276 capture of non-KMTs, then  $j(s)$  would be non-zero in the spindle bulk (Figure 6d, lower). In this  
277 latter case,  $j(s)$  would be the rate that a non-KMT whose minus end is at a position  $s$  along a

278 streamline has its plus end captured by a kinetochore. We considered a model of non-KMT capture  
279 where any non-KMT can be captured provided that it reaches the kinetochore. We took the  
280 distribution of non-KMT minus ends along streamlines (Figure 6s2) as a proxy for the non-KMT  
281 nucleation rate, implying that  $j(s)$  is proportional to non-KMT minus end density times that  
282 probability that a nucleated non-KMTs grows long enough to reach the kinetochore before  
283 undergoing catastrophe and depolymerizing (see supplement). The kinetochore nucleation model  
284 predicts that the minus end speed monotonically increases with distance away from the pole along  
285 streamlines (Figure 6E). The non-KMT capture model predicts that the speed is near zero  
286 throughout the spindle. The two models thus offer qualitatively different predictions for KMT  
287 motions.

288 To understand why the two models offer qualitatively different predictions for the KMT  
289 minus end speeds, it is helpful to consider the contribution of each of the terms in the mass  
290 conservation, Equation 1, separately in the spindle bulk, where the minus end density distribution  
291 is roughly flat. In the nucleate at kinetochore model, the recruitment term,  $j(s)$ , is zero by  
292 definition. The first KMT minus end motion flux term  $v(s) \frac{dn}{ds} = 0$  as well because the minus end  
293 density distribution is flat (i.e.  $\frac{dn(s)}{ds} = 0$ ). This leaves only the second KMT minus end motion  
294 flux term,  $\frac{dv}{ds} n(s)$ , which describes changing KMT minus end speed and the detachment term  
295  $rn(s)$ , giving  $\frac{dv}{ds} n(s) - rn(s) = 0$ , or equivalently  $\frac{dv}{ds} = r$ . Thus, a linear increase in the speed  
296 of the KMTs with distance from the pole balances the constant detachment term in the spindle  
297 bulk. In contrast, in the capture from spindle model, the  $j(s)$  recruitment term is non-zero and can  
298 counteract the detachment terms in place of the changing speed term. The experimentally observed  
299 density of non-KMT minus ends is roughly the same as the density of KMT minus end along  
300 streamlines, so the newly nucleated KMTs roughly recapitulate the observed distribution, leaving  
301 a near-zero speed everywhere in the capture from spindle model. Therefore, the nucleate at  
302 kinetochore model predicts that the speed of KMT minus ends will increase with distance from  
303 the pole while the capture from spindle model predicts the KMT minus end speed is near-zero  
304 throughout the spindle.

305  
306

### 307 **A simulation of the photoconversion experiment with nucleation at the kinetochore is** 308 **consistent with the observed speed of tubulin**

309 We next sought to determine whether the predictions from either the nucleate at  
310 kinetochore model or the capture from the spindle model were consistent with the motions of  
311 tubulin measured from photoconversion experiments. To do so, we simulated the motion of a  
312 photoconverted line of tubulin in the spindle using the two different models for KMT recruitment  
313 with the dynamics inferred from the flux balance analysis (Figure 6E).

314 Our simulations used a discrete model of KMTs with recruitment, growth, and detachment  
315 along streamlines in the spindle. At each timestep of the simulation, we generated newly recruit  
316 KMTs with Poisson statistics. The plus end position of these new KMTs was selected from the  
317 experimentally measured density distribution of kinetochores along streamlines (binned from all  
318 three reconstructed spindles) (Figure 7s1). The initial position of the minus ends of these new  
319 KMTs depended on the recruitment model: for the kinetochore nucleation model, the KMT minus  
320 end started at the position of kinetochores; in the capture from spindle model, the initial KMT  
321 minus end position was drawn from the (non-zero) distribution  $j(s)$  (see supplement). Thus, in the

322 kinetochore nucleation model, newly recruited KMTs start with zero length (since they are  
323 nucleated at kinetochores), while in the spindle-capture model KMTs begin with finite length  
324 (since they arise from non-KMTs whose plus ends bind kinetochores). After a lifetime drawn from  
325 an exponential distribution with a detachment rate  $r = 0.4 \text{ min}^{-1}$  (based on our photoconversion  
326 measurements), the KMT detaches from the kinetochore and is removed from the simulation.

327 In our model, newly polymerized tubulin incorporates at stationary, kinetochore bound  
328 KMT plus ends, while their minus ends move backwards along the streamline towards the pole  
329 with the experimentally inferred speed  $v(s)$ , which varies based on the recruitment model (Figure  
330 6E). In the absence of minus end depolymerization, all of the tubulin in a KMT moves at the same  
331 speed as its minus end  $v_{tub}(s) = v(s)$ , for a KMT whose minus end is at position  $s$ . If, however,  
332 the minus end of a KMT depolymerizes with a speed  $v_{tread}(s)$ , then the tubulin in the KMT will  
333 move faster than its minus end, at speed  $v_{tub}(s) = v(s) + v_{tread}(s)$ . Based on a “chipper-  
334 feeder” model of minus end depolymerization, we included minus end depolymerases only at the  
335 spindle pole (Gabbe and Heald 2004, Dumont and Mitchinson 2004, Long et al. 2020). KMT  
336 minus ends in the spindle bulk thus move along streamlines without minus end depolymerization.  
337 When KMT minus ends enter the pole region at position  $s_p = 1.5 \mu\text{m}$  along a streamline, the  
338 tubulin continues to incorporate at the plus end at the same speed as at the pole boundary, but  
339 minus end depolymerization begins, leading to tubulin to treadmill through the KMT at speed  
340  $v_{tread}(s) = [v(s_p) - v(s)]\theta(s_p - s)$ , where  $\theta(s)$  is the Heavyside step function.

341 Both the kinetochore nucleation model and the capture from spindle model reproduce the  
342 experimentally measured KMT minus end distribution along streamlines (Figure 6S3), as they  
343 must by construction. We next considered a 2D slice of a spindle (to replicate confocal imaging)  
344 and modeled photoconverting a line of tubulin in the spindle with a modified Cauchy profile, which  
345 fits the shape of the experimentally converted region well (Figure 7S2). We simulated the motion  
346 of tubulin in individual KMTs and summed the contributions of each KMT together to produce a  
347 final simulated spindle image. Such simulations of the kinetochore nucleation model showed a  
348 steady poleward motion of the photoconverted tubulin (Figure 7A). In contrast, simulations of  
349 photoconverted tubulin in the capture from spindle model exhibited substantially less motion  
350 (Figure 7S3). To facilitate comparison to experiments, we analyzed the simulations with the same  
351 approach we used for photoconversion data. First, we projected the simulated photoconverted  
352 tubulin intensity onto the spindle axis to find the photoconverted line profile over time (Figure 7A,  
353 lower). We then fit the simulated line profile to a Gaussian and tracked the position of the peak  
354 over time to determine the speed of tubulin at the location of photoconversion. We varied the  
355 position of the simulated photoconversion line and repeated this procedure, to measure the speed  
356 of tubulin throughout the spindle in the two recruitment models (Figure 7B). The predicted  
357 spatially varying speeds of tubulin in the kinetochore nucleation model are consistent with  
358 experimentally measured values (Figure 3F), while the prediction from the capture from spindle  
359 model are too slow. If minus end depolymerization at the pole is turned off in the simulations, then  
360 the predicted speeds from both recruitment models become inconsistent with the experimental data  
361 (Figure 7S4).

362 Our analysis showed that a model in which all KMTs nucleate at kinetochores is consistent  
363 with the observed speeds of tubulin throughout the spindle, while a model in which all KMTs are  
364 captured from the spindle bulk is inconsistent with this data. We next considered hybrid models  
365 which contained both KMT recruitment mechanisms. We simulated the motion of a line of  
366 photoconverted tubulin and varied the portion of KMTs nucleated at the kinetochore vs. captured  
367 from the spindle. We compare the feasibility of predictions from hybrid models with the data by



368 calculating the Bayesian probability of observing the measured speeds with a uniform prior (Figure  
369 7C). The model probability peaks at the edge where all KMTs are nucleated by the kinetochore.  
370 Thus, while the observed speeds are not inconsistent with a small fraction (less than 20%) of KMTs  
371 being captured from the spindle bulk, the data favors a model where KMTs are exclusively  
372 nucleated at kinetochores.

373

### 374 **A quantitative 3D model of KMT nucleation, minus end motion and detachment**

375 We therefore propose a model where KMTs nucleate at kinetochores and grow along  
376 streamlines (Figure 8A). As the KMTs grow, they slow down until they reach the pole where minus  
377 end depolymerization causes tubulin to treadmill through the MT. The KMTs detach from the  
378 kinetochore at a constant rate, independent of their position in the spindle.

379 To test our model predictions against the full 3D reconstructed KMT ultrastructure of each  
380 spindle, we simulated the nucleation, growth and detachment of KMTs in 3D for each spindle  
381 separately. In each spindle, we simulated KMT nucleation by placing newly formed, zero length  
382 KMTs at the reconstructed kinetochore positions with Poisson statistics. The KMT minus ends  
383 then move towards the pole at the experimentally inferred speed  $v(s)$  undergo minus end  
384 depolymerization near the pole causing tubulin to treadmill at speed  $v_{tread}(s) = [v(s_p) -$   
385  $v(s)]\theta(s_p - s)$ , and detach with a constant rate  $r$ .

386 The agreement between the electron tomography reconstruction (Figure 8B) and the  
387 predicted model structure is striking (Figure 8C, Video 8S1). We next compared the lengths of  
388 KMTs from the simulations with the experimentally measured length distribution. We found the  
389 lengths of KMTs in the simulated spindles by measuring the distance between the minus and plus  
390 end along the model KMT streamline trajectory; in the reconstructed spindles we traced the  
391 arclength of each KMT along its reconstructed trajectory. We binned the KMT lengths for each  
392 simulated and reconstructed spindle and averaged the spindles together to obtain the KMT length  
393 distributions. (Figure 8D). The observed length distribution of the KMTs from the reconstructed  
394 spindles is well predicted by the model. To compare the orientation of the simulated and  
395 reconstructed KMTs, we divided the MTs into short 100 nm sections and projected these sub-  
396 segments onto the spindle axis to find what portion of the section lie on the spindle axis. We binned  
397 the projections from each spindle and averaged the three resulting distributions together to obtain  
398 the distribution of projected lengths along the spindle axis (Figure 8E). There is similarly good  
399 agreement between the simulation prediction and the reconstructed projected lengths along the  
400 spindle axis. Both the predicted lengths and orientations of the KMTs are thus consistent with the  
401 ultrastructure measured by electron tomography.

402 We finally tested whether the predicted tubulin motion was consistent with the  
403 photoconversion experiment. We simulated the motion of a photoconverted plane of tubulin (with  
404 a modified Cauchy intensity profile) as we did in the 2D confocal case, but now moved the tubulin  
405 along 3D nematic trajectories (Movie 8S1). To simulate confocal imaging, we projected a thin  
406  $1\mu\text{m}$  confocal z-slice centered at the poles onto the spindle axis over the course of the simulation  
407 to produce a line profile. The simulated line profile agrees well with the experimental profile even  
408 after 60 seconds of simulation time (Figure 8F), indicating that the dynamics of the model are  
409 consistent with the experimentally measured tubulin motion and turnover. Taken together, these  
410 results favor a model where KMTs nucleate at the kinetochore, grow and slow down along nematic  
411 streamlines, undergo minus end depolymerization near the pole and detach with a constant rate.  
412 Such a model is consistent with both measurements of KMT ultrastructure, from EM, and  
413 measurements KMT dynamics, from photoconversion, in HeLa cells.

414

## 415 **DISCUSSION**

416

417 In this study, we leveraged recent electron tomography reconstructions that contain the  
418 positions, lengths, and configurations of microtubules in metaphase spindles in HeLa cells  
419 (Kiewisz et al. 2021). We used this dataset, in combination with live cell microscopy  
420 measurements and biophysical modeling, to investigate the behaviors of KMTs. We found that  
421 roughly half of KMT minus ends were not located at the poles (Figure 1). To better understand  
422 this KMT minus end distribution we performed a series of photoconversion experiments to  
423 measure the dynamics of KMTs. The fraction of slow turnover tubulin measured from  
424 photoconversion matched the fraction of tubulin in KMTs measured by electron tomography. This  
425 observation argues that KMTs are the only MTs in metaphase spindles that are appreciably  
426 stabilized. The photoconversion experiments also showed that the speed of tubulin in KMTs  
427 slowed down near the poles and that KMT turnover was uniform throughout the spindle (Figure 2  
428 and 3). We found that both KMTs and non-KMTs were highly aligned (Figure 4) and that the  
429 orientations of MTs throughout the spindle can be quantitatively explained by an active liquid crystal  
430 theory in which MTs locally align with each other due to their mutual interactions (Figure 5). This  
431 suggests that KMTs tend to move along well-defined trajectories in the spindle, so we analyzed  
432 the distribution of KMT minus ends along these trajectories (Figure 6). From these distributions,  
433 we predicted the speed of KMT minus ends using a mass conservation analysis. This analysis  
434 depends on the model of how KMTs are recruited to the kinetochore. We found that predictions  
435 from the nucleate at kinetochore model agreed well with the experimental measurements while the  
436 predictions from the capture from spindle model did not (Figure 7). We therefore propose a model  
437 where KMTs are nucleated at the kinetochore and polymerize from their plus ends as their minus  
438 ends move backwards along nematic streamline trajectories towards the pole, slowing down as  
439 they approach the pole. KMTs detach from the kinetochore at a constant rate. This model  
440 accurately predicts the lengths, orientations, and dynamics of KMTs in mitotic spindles of HeLa  
441 cells (Figure 8).

442 Previous work has shown that the photoconversion of tubulin in the spindle implies that  
443 there are at least two population of MTs, one with fast and one with slow turnover (Gorbsky and  
444 Borisy 1989, DeLuca et al. 2016, Warren et al. 2020). While the slow turnover fraction has often  
445 been ascribed to KMTs (Zhai et al 1995, Deluca et al 2010, Kabeche and Compton 2013), some  
446 work has suggested that substantial fractions of non-KMTs may be stabilized as well (Tripton  
447 2021). We found that the fraction of tubulin in KMTs identified structural from the EM  
448 reconstructions ( $25\pm 2\%$ ) and the stable fraction from the photoconversion experiments ( $24\pm 2\%$ )  
449 are statistically indistinguishable (Figure 2). This agreement argues that KMTs account for the  
450 overwhelming majority of stable MTs in the spindle. Thus, the slow decay rate can be interpreted  
451 as the rate of KMT turnover. Our observation that the slow decay rate is uniform thorough out  
452 the spindle, suggests that KMTs detached from the kinetochore at a constant rate, independent of  
453 the position of their minus ends in the spindle (Figure 3). The speed of a photoconverted line of  
454 tubulin is slower for lines drawn near the poles than in the center of the spindle. Since the speed  
455 of tubulin moving in KMTs in the spindle bulk is coupled to tubulin polymerization at the KMT  
456 plus end, this suggests that longer KMTs grow more slowly than shorter KMTs.

457 We found that MTs in spindles in HeLa cells were well-aligned with a high scalar  
458 nematic order parameter along orientations that are consistent with the predictions of an active  
459 liquid crystal theory. This implies that the orientations of MTs in the spindle is dictated by their

460 tendency to locally align with each other. The tendency of MTs in the spindle to locally align  
461 with each other could result from the activity of MT crosslinkers, such as dynein, kinesin-5, or  
462 PRC1 (Kapitein et al. 2005, Tanenbaum et al. 2013, Wijeratne and Subramanian 2018), or  
463 simply from steric interactions between the densely packed rod-like MTs. The volume fraction of  
464 MTs in the reconstructed spindles is  $0.052 \pm 0.05$ , which is slightly above the volume fraction  
465 where the nematic phase is expected to become more stable than the isotropic phase ( $\sim 0.04$ ) (Doi  
466 and Edwards 1988, Brugués and Needleman 2014). Steric interaction between the MTs could  
467 therefore be enough to explain the observed nematic behavior. Studying spindles with depleted  
468 crosslinking proteins, lower MT density and perturbed KMT dynamics would help to determine  
469 the origin of these aligning interactions.

470 It has previously been unclear to what extent KMTs nucleate de novo at kinetochores vs  
471 resulting from non-KMTs being captured by the kinetochore (Tezler et al. 1975, Mitchinson  
472 and Kirschner 1985a, Mitchinson and Kirschner 1985b, Huitorel and Kirschner 1988, Heald and  
473 Khodjakov 2015, LaFountain and Oldenborug 2014, Petry 2016, Sikirzhyski et al. 2018, David  
474 et al. 2019, Renda and Khodjakov 2021). We show that a model where KMTs nucleate at  
475 kinetochores is consistent with the KMT ultrastructure observed in the tomography  
476 reconstructions and the tubulin dynamics observed in the photoconversion experiments. Our  
477 results would also be consistent with a model in which specifically MTs nucleate very near the  
478 kinetochore and are rapidly captured. . Such a capture of short MTs near the kinetochore could  
479 be consistent with observations of short MTs near chromosomes during prometaphase  
480 (Sikirzhyski et al. 2018).

481 The present work combined large-scale EM reconstructions, light microscopy, and theory  
482 to study the behaviors of KMTs in metaphase spindles. The behaviors of KMTs may be  
483 dominated by other processes at those different times. In the future, it would be interesting to  
484 apply a similar methodology to investigate the behavior of KMTs during spindle assembly in  
485 prometaphase and chromosome segregation in anaphase. Another interesting direction would be  
486 to apply a similar methodology to the study of spindles in other organisms. Previous EM  
487 reconstructions in *C. elegans* mitotic spindles have found a similar distribution of KMT lengths  
488 in metaphase (Redemann et al 2017). Acquiring electron tomography reconstructions and  
489 dynamics measurements in a different model systems would help elucidate whether the proposed  
490 KMT lifecycle is conserved across metazoans or unique to human cells.

491 One significant feature of the nematic-aligned, nucleate-at-kinetochore model is that it  
492 provides a simple hypothesis for the mechanism of chromosomes biorientation: A pair of sister  
493 kinetochores, with each extending KMTs, will naturally biorient as the KMTs locally align along  
494 nematic streamlines that are flat near the center of the spindle. Once bioriented, newly nucleated  
495 KMTs from either sister will naturally grow towards opposite poles. Microtubules attached to the  
496 incorrect pole will turnover over and be replaced by newly nucleated microtubules that will  
497 integrate into the nematic network, growing towards the correct pole. Once all of the incorrect  
498 microtubules have been cleared, tension generated across the opposite sisters will stabilize the  
499 existing, correct attachments. The nematic aligned, kinetochore-nucleated picture thus provides a  
500 self-organized physical explanation for chromosome bi-orientation and the correction of mitotic  
501 errors. It will be an exciting challenge for future work to test the validity of this picture.

502  
503

## 504 MATERIALS AND METHODS

505

## 506 **HeLa Cell Culture and Cell Line Generation**

507

508 HeLa Kyoto cells were thawed from aliquots and cultured in DMEM (ThermoFisher)  
509 supplemented with 10% FBS (ThermoFisher) and Pen-Strep (ThermoFisher) at 37°C in a  
510 humidified incubator with 5% CO<sub>2</sub>. Cells were regularly tested for mycoplasma contamination  
511 (Southern Biotech).

512 Three stable HeLa cell lines were generated using a retroviral system. A stable HeLa Kyoto  
513 cell line expressing mEOS3.2-alpha tubulin and CENPA - GFP was generated and selected using  
514 puromycin and blasticidin (ThermoFisher) (Yu et al. 2019). An additional mEOS3.2-alpha tubulin  
515 and SNAP-Centrin cell line was generated and selected using puromycin, blasticidin and  
516 hygromycin. A final cell line expressing CENPA-GFP and GFP-Centrin was generated and  
517 selected using puromycin and hygromycin.

518

## 519 **Spinning Disc Confocal Microscopy and Photoconversion**

520

521 All photoconversion experiments were performed on a home built spinning disc confocal  
522 microscope (Nikon Ti2000, Yokugawa CSU-X1) with 488nm, 561nm and 647nm lasers, an  
523 EMCCD camera (Hamamatsu) and a 60x oil immersion objective. Imaging was controlled using  
524 a custom Labview program (Wu et al. 2016). Two fluorescence channels were acquired every 5s  
525 with either 300ms 488nm and 500ms 561nm exposure for the initial imaging with the pre-  
526 converted frame or with 500ms 561nm and 300ms 647nm exposure for experiments with the  
527 SNAP-Centrin pole marker. The mEOS3.2 was photoconverted using a 405nm diode laser  
528 (Thorlabs) and a PI-XYZnano piezo (P-545 PInano XYZ; Physik Instrumente) to draw the  
529 photoconverted line. The line was moved at a speed of 5um/s with a laser power of 500nW  
530 (measured at the objective). Cells were plated onto 25-mm-diameter, #1.5-thickness, round  
531 coverglass coated with poly-d-lysine (GG-25-1.5-pdl, neuVibro) the day before experiments. Cells  
532 were stained with 500nM SNAP-SIR (New England Biolabs) in standard DMEM media for 30  
533 minutes and then recovered in standard DMEM media for at least 4 hours. Before imaging, cells  
534 were pre-incubated in an imaging media containing Fluorobrite DMEM (ThermoFisher)  
535 supplemented with 10mM HEPES for ~15min before being transferred to a custom-built cell-  
536 heater calibrated to 37°C. In the heater, cells were covered with 750µL of imaging media and  
537 2.5mL of mineral oil. Samples were used for roughly 1 hour before being discarded.

538

## 539 **Quantitative Analysis of Photoconversion Data**

540

541 All quantitative analysis was performed using a custom MATLAB GUI. We first fit the  
542 tracked both poles using the Kilfiol tracking algorithm (Gao and Kilfoil 2009) and defined the  
543 spindle axis as the line passing between the two pole markers. We generated a line profile along  
544 the spindle axis was then generated by averaging the intensity in 15 pixels on either side of the  
545 spindle axis. The activated peak from each frame was fit to a Gaussian using only the central  
546 [check number] pixels. If multiple peaks were identified, the peak closest to the peak from the  
547 previous frame was used. The position of the peak was defined to be the distance from the center  
548 of the peak to the pole marker. To determine the height of the peak, we subtracted the height of  
549 the gaussian from the height of a gaussian fit on the opposite side of the spindle to correct for  
550 background and divided by a bleaching calibration curve.

551

## 552 **Bleaching Calibration**

553

554 HeLa spindles were activated by drawing 3 lines along the spindle axis from pole to pole.  
555 We then waited 5 minutes for the tubulin to equilibrate and began imaging using the same  
556 conditions as during the photoconversion measurement (561nm, 500ms exposure, 5s frames;  
557 647nm, 300ms exposure, 5s frames). We calculated the mean intensity inside an ROI around the  
558 spindle (Figure 2s1a) and plotted the average of the relative intensity of 10 cells). We subtracted  
559 off a region outside of the cell to account for the dark noise of the camera. We then divide our  
560 intensity vs. time curve by the bleaching calibration curve to produce a bleaching-corrected  
561 intensity curve to fit to a dual-exponential model.

562

## 563 **Polarized Light Microscopy (PolScope)**

564

565 We measured the orientation of spindle MTs in living cells using an LC-PolScope  
566 quantitative polarization microscope (Oldenbourg et al. 1998, Oldenbourg et al. 2005) The  
567 PolScope hardware (Cambridge Research Instruments) was mounted on a Nikon TE2000-E  
568 microscope equipped with a 100x NA 1.45 oil immersion objective lens. We controlled the  
569 PolScope hardware and analyze the images we obtained using the OpenPolScope software  
570 package. To ensure that the long axis of the spindle lies in or near the image plane, we labeled the  
571 poles with SNAP-Sir and imaged the poles using epifluorescence while we acquired the PolScope  
572 data. In all subsequent analysis, we use only data from cells where the poles lie within  $\sim 1 \mu\text{m}$  of  
573 each other in the direction perpendicular to the image plane. To average the orientation fields from  
574 different spindles, we first determined the unique geometric transformation (rotation, translation,  
575 and rescaling) that aligns the poles. We then applied the same transformation to the orientation  
576 fields and took the average.

577

## 578 **Fitting Average MT Angles to Nematic Theory**

579

580 For each 3D reconstructed spindle, the positions of the MTs were first projected into a 2D  
581 spindle axis-radial axis plane (averaging along the  $\phi$  direction in cylindrical coordinates into a  
582 single plane, see Figure 4s3). Local MT angles were then averaged ( $\langle\Theta\rangle = \arg(\langle\exp(2\pi i\Theta)\rangle)/2$ ) in  
583  $0.1\mu\text{m}$  by  $0.1\mu\text{m}$  bins in the spindle-radial plane.

584 We registered the three EM spindles by rescaling them along the spindle and radial axis.  
585 We rescaled the spindle axis of each spindle so all three spindles had the same pole-pole distance.  
586 We rescaled the radial axis so that the width of the spindles, measured by the width of an ellipse  
587 fit to the spindle density in the spindle axis-radial axis plane, was the same. We then averaged the  
588 three EM spindles together to produce Figure 5A. We similarly registered the PolScope images by  
589 rescaling the spindle axis using the pole-pole distance and the radial axis using the width of an  
590 ellipse fit to the spindle retardance image before averaging the cells together to produce Figure  
591 5B.

592 The angles predicted by the active liquid-crystal model were found by solving the Laplace  
593 equation in the spindle bulk using a 2D finite difference method subjected to the tangential  
594 anchoring and defect boundary conditions. The model's geometric parameters were determined by  
595 fitting the predicted angles to the averaged EM data by minimizing a  $\chi^2$  statistic. We first fit the  
596 height, width and center of the elliptical boundary with the  $m=1$  defects fixed at the edge using the  
597 averaged EM spindles. The elliptical boundary parameters were then fixed, and the position of the

598 m=1 defects along the spindle axis and the radius of the defects were fit to produce Figure 5C. The  
599 individual spindles were similarly fit by first fitting the elliptical boundary with the m=1 defects  
600 on the edge and then fitting the position and radius of the defects to produce Figure 6s1.  
601  
602

| <b>Reagent type (species) or resource</b>     | <b>Designation</b>                                              | <b>Source of refrence</b>         | <b>Identifiers</b> | <b>Additional</b>                                                                             |
|-----------------------------------------------|-----------------------------------------------------------------|-----------------------------------|--------------------|-----------------------------------------------------------------------------------------------|
| Cell line ( <i>Homo sapiens</i> )             | HeLa Kyoto                                                      | Gerlich Lab, IMBA, Vienna Austira | -                  | -                                                                                             |
| Transfected construct ( <i>Homo sapeins</i> ) | pBABE-puro<br>CENP-A:GFP                                        | Yu et al. 2019                    | -                  | CENP-A C-terminally labeled with sfGFP; in retroviral vector with puromycin selection marker  |
| Transfected construct ( <i>Homo sapeins</i> ) | pBABE-hygro<br>SNAP-Centrin                                     | This paper                        | -                  | CENP-A C-terminally labeled with sfGFP; in retroviral vector with hygromycin selection marker |
| Transfected construct ( <i>Homo sapeins</i> ) | pJAG98(pBABE-blast) mEOS3.2-alpha tubulin                       | Yu et al. 2019                    | -                  | CENP-A C-terminally labeled with sfGFP; in retroviral vector with blastcidin selection marker |
| Commerical assay or kit                       | SNAP-Cell 647-SiR                                               | New England Biolabs               | -                  | Catalog number S9102S                                                                         |
| Software algorithm                            | Interactive spindle photoconversion analysis GUI (MATLAB 2020b) | This paper                        | -                  | -                                                                                             |
| Software algorithm                            | Photoconversion simulation package                              | This paper                        | -                  | -                                                                                             |
| Software algorithm                            | Photoconversion control and imaging                             | Wu et al. 2016                    | -                  | Controls custom confocal photoconversion for arbitrary geometry                               |

|                    |                                             |                  |   |   |
|--------------------|---------------------------------------------|------------------|---|---|
| Software algorithm | Polarizaed light microscopy control sofware | OpenPolScope.org | - | - |
|--------------------|---------------------------------------------|------------------|---|---|

603

604

605 **ACKNOWLEDGMENTS**

606

607 The authors would like to thank Gloria Ha and Che-Hang Yu for technical assistance with  
608 experiments; Reza Farhadifar and Sebastian Fürthauer for helpful comments on the manuscript, .  
609 Research in the Needleman Lab is supported by the NSF-Simons Center for Mathematical and  
610 Statistical Analysis of Biology at Harvard (award number #1764269), and the Harvard  
611 Quantitative Biology Initiative. Will Conway was support by an NSF GRFP fellowship and an  
612 NSF-Simons Harvard Quantitative Biology Initiative student fellowship. Research in the Müller-  
613 Reichert laboratory is supported by funds from the Deutsche Forschungsgemeinschaft (MU  
614 1423/8-2). R.K. received funding from the European Union’s Horizon 2020 research and  
615 innovation program under the Marie Skłodowska-Curie grant agreement No. 675737 (grant to  
616 T.M.R.).

617

618 **COMPETING INTERESTS**

619

620 The authors declare no competing financial interests



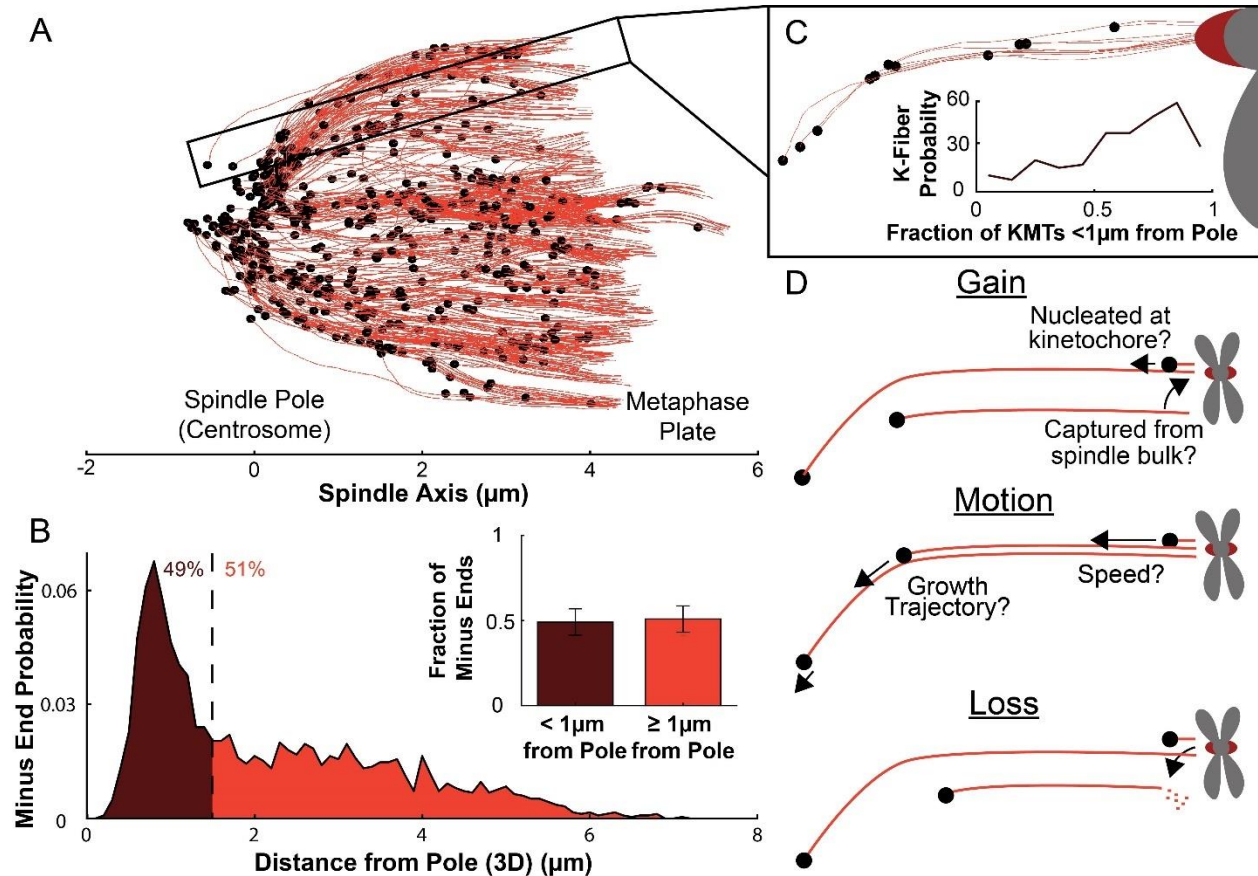

621  
 622 **Figure 1: Many KMT minus ends are not in the vicinity of the pole.** A) A sample half spindle  
 623 showing the KMTs from the EM ultrastructure. KMTs are shown in red while minus ends are  
 624 shown in black. The spindle pole lies at 0 $\mu\text{m}$  on the spindle axis while the metaphase plate is  
 625 between 4-6  $\mu\text{m}$  on the spindle axis. B) The frequency of 3D minus end distance from the pole.  
 626 Inset: the fraction of minus ends within 1 $\mu\text{m}$  of the pole. C) A sample k-Fiber. Again, KMTs are  
 627 shown in red, minus ends are shown in black. The large red circle is the kinetochore. Inset:  
 628 probability of k-Fiber with fraction of KMTs near the pole D) Schematic representation of models  
 629 of KMT gain, motion and loss.  
 630

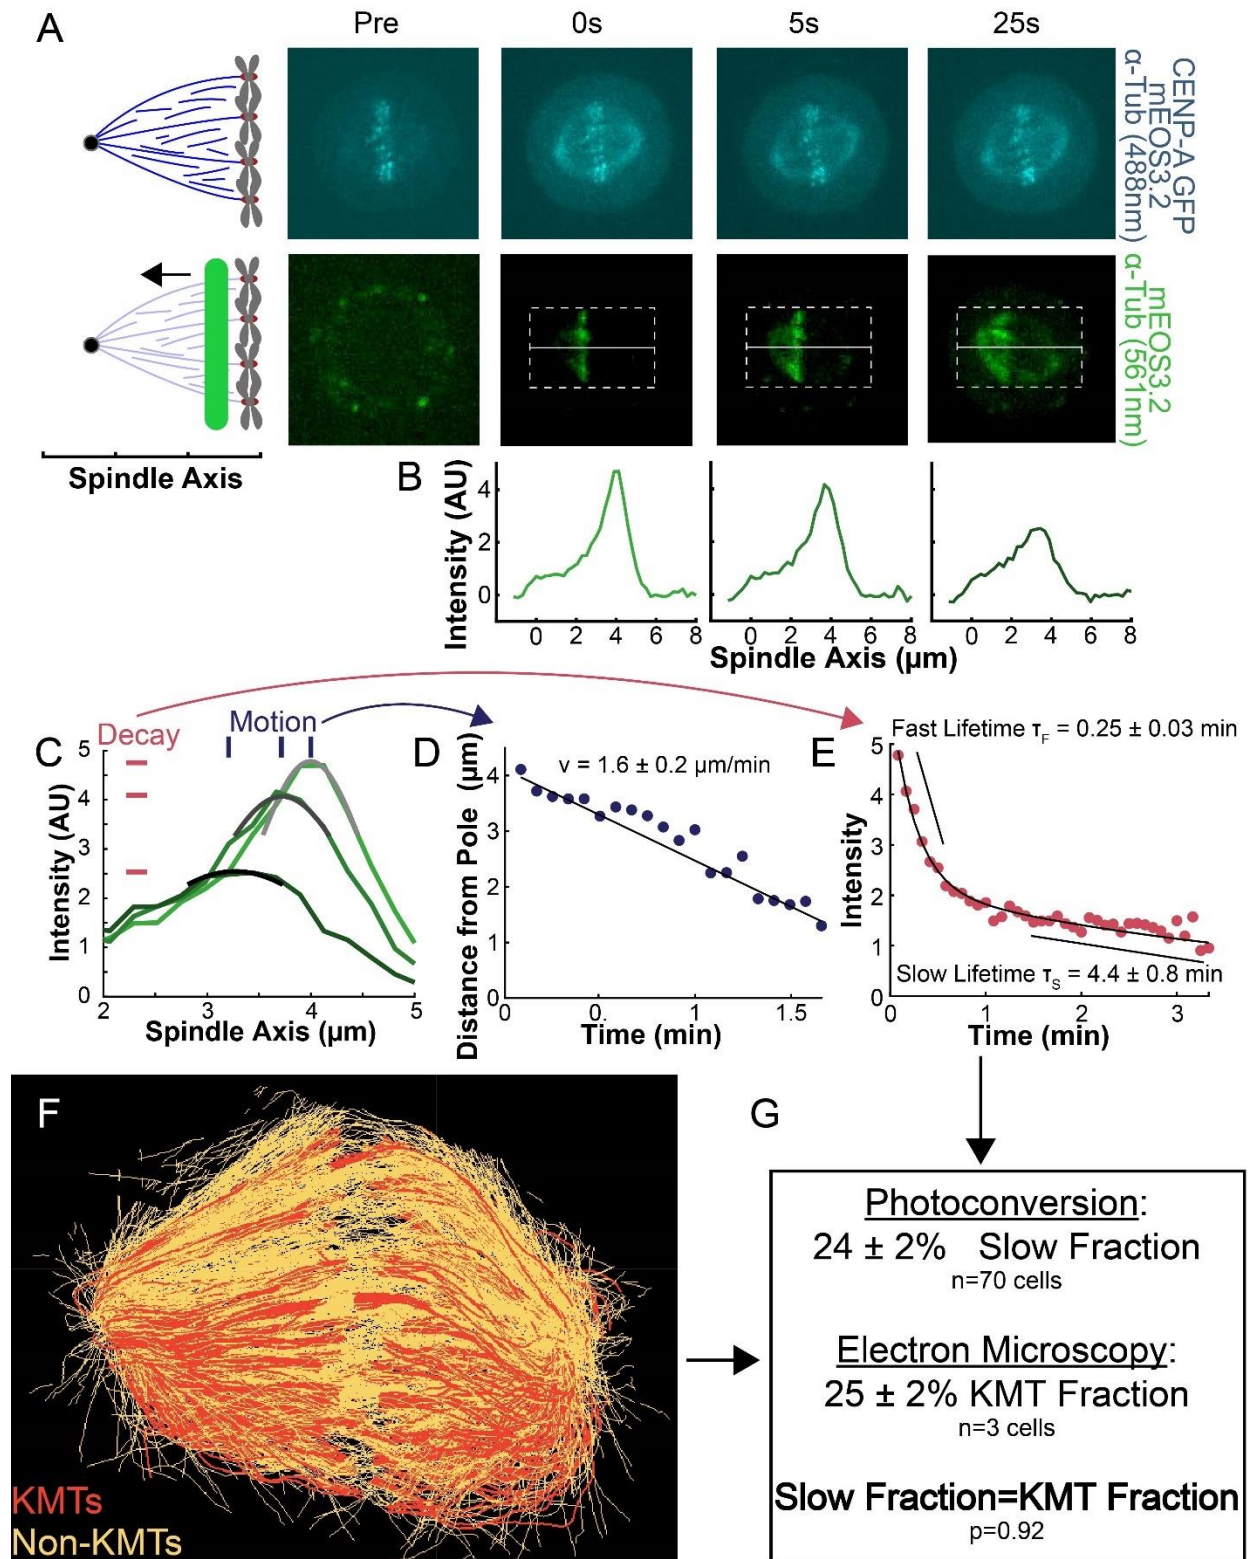

631  
632  
633  
634  
635

**Figure 2: Photoconversion of spindle tubulin in live HeLa cells.** A) Pre-converted frame showing CENPA-GFP and mEOS3.2-alpha tubulin. 488nm, 300ms exposure, 5s frame rate. Time stamps show pre photoconversion, 0s, 5s and 25s after photoconversion. Post-conversion frame showing mEOS3.2-alpha tubulin after exposure to 40nm light. 561nm, 500ms exposure, 5s frame

636 rate. B) Line profile pulled from the dotted box shown in B. The intensity is corrected for  
637 background from the opposite side of the spindle (see methods) C) Line profiles (shades of green)  
638 fit to Gaussian profiles (shades of grey) at 0s, 5s and 25s. Lighter shades are earlier times. The  
639 solid line on the fit represents the fit pixels D) Blue dots: fit position of the line profile peak from  
640 the sample cell shown in A, B, and C over time. Black line: linear fit to the central position of the  
641 fit peak over time. E) Red dots: fit height of the line profile peak from the sample cell shown in A,  
642 B, and C over time. Black line: dual-exponential fit to the fit height of the peak over time. F)  
643 Sample ultrastructure from a single EM spindle (Kiewisz et al., 2021). KMTs are shown in red,  
644 non-KMTs yellow). G) Comparison between the mean slow fraction from the photoconversion  
645 data ( $24 \pm 2\%$ ,  $n=70$  cells) and the fraction of KMTs ( $25 \pm 2\%$ ,  $n=3$  cells) from the EM data. The two  
646 means are statistically indistinguishable with  $p=0.92$  on a Student's t-test.

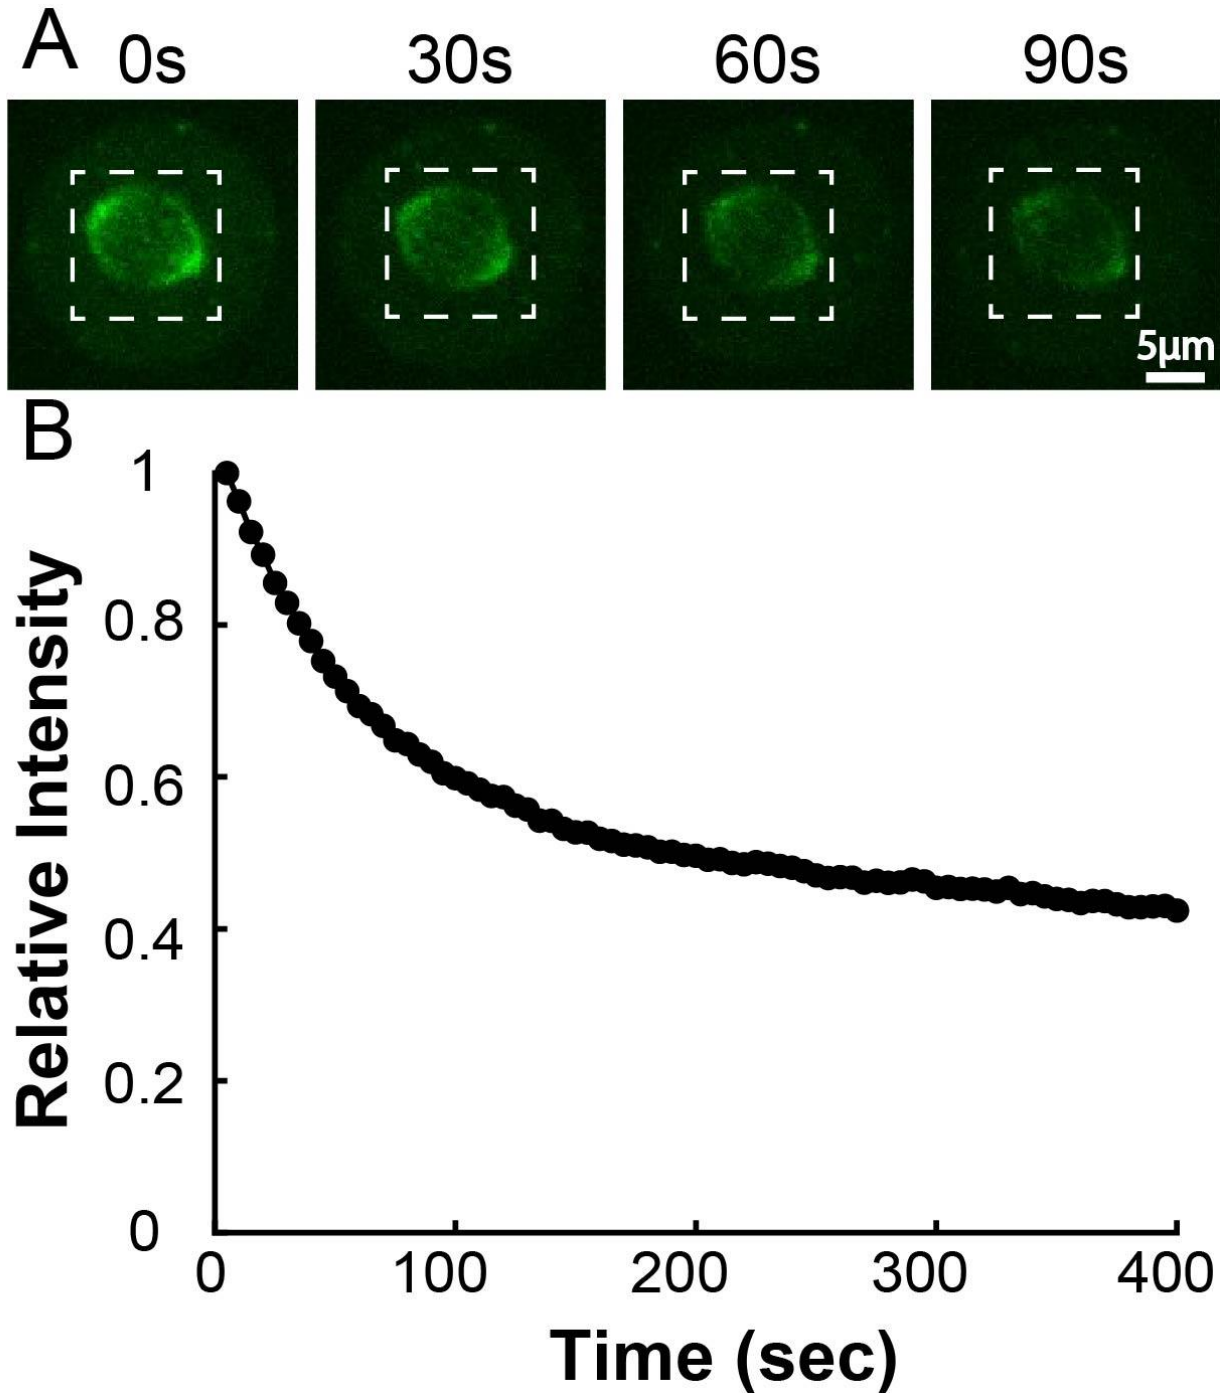

647  
648 **Figure 2s1: mEOS3.2-Alpha Tubulin Bleaching Calibration.** A) Time series of activated  
649 tubulin in spindles. The whole spindle was photoactivated with 405nm UV light and left to  
650 equilibrate for 5 minutes before imaging B) Mean integrated spindle intensity over time (boxed  
651 region). Curves were corrected for dark background by subtracting the mean intensity of a small  
652 region marked outside the cell. Curves from 5 cells were normalized to the initial intensity at t=0s  
653 and then averaged together.

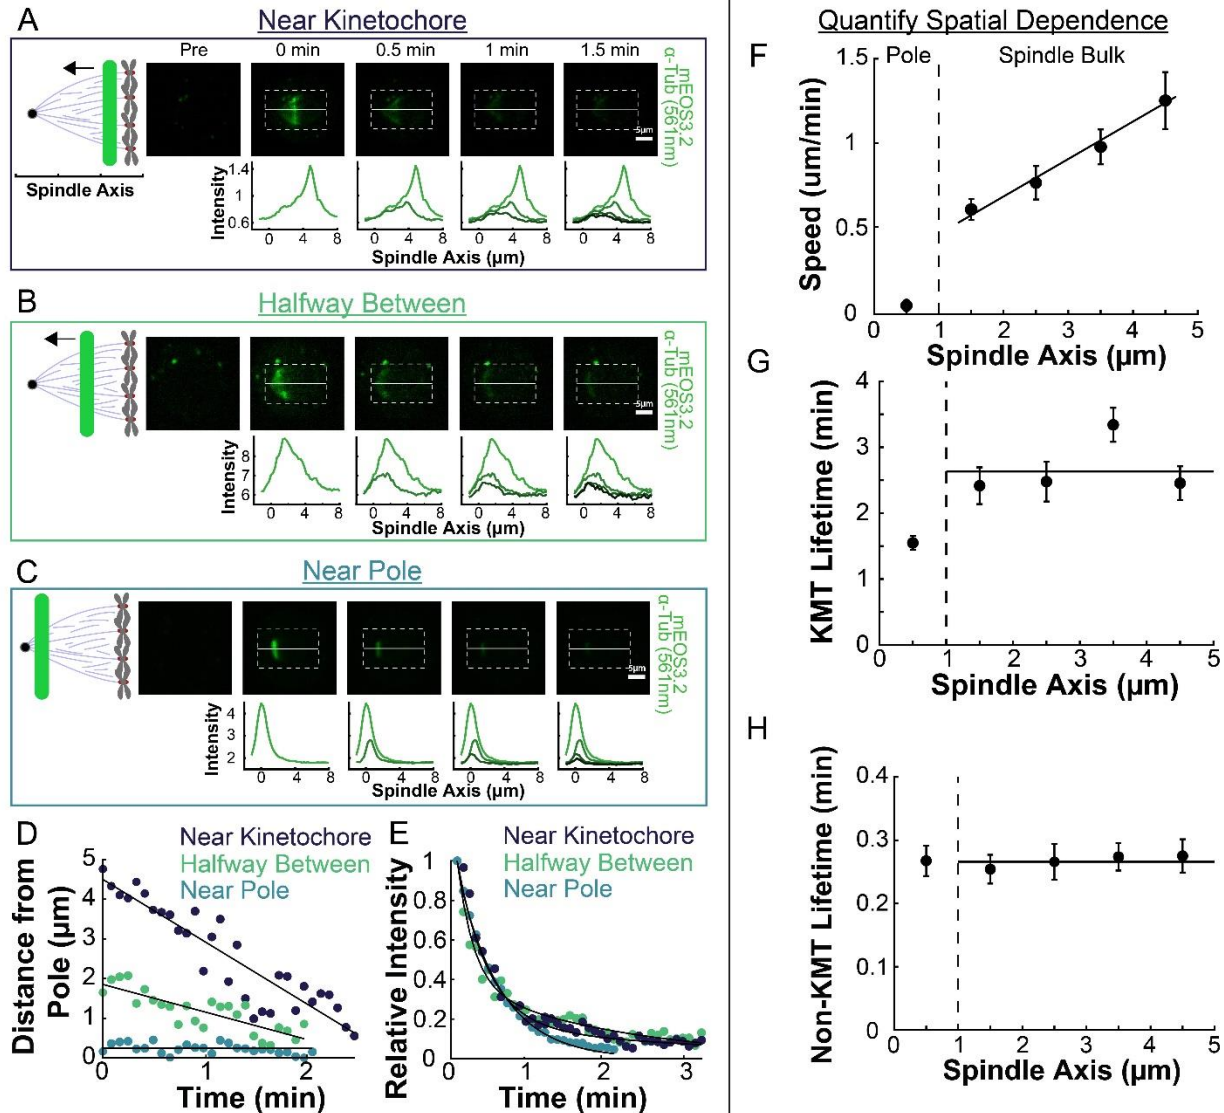

654  
 655 **Figure 3: Spatial dependence of photoconversion parameters.** A) Sample photoconverted  
 656 frames (561nm, 500ms exposure, 5s frame rate) and line profiles from a line drawn near the  
 657 kinetochores. B) Sample photoconverted frames and line profiles from a line drawn halfway  
 658 between the kinetochores and the pole. C) Sample photoconverted frames and line profile from a  
 659 line drawn near the pole. D) Linear fits to the central position of the peaks from A, B and C to  
 660 measure the line speed. E) Dual-exponential fits to the intensity of the line in A, B and C to  
 661 measure the KMT and non-KMT lifetimes. F) Line speed vs. initial position of the line drawn on  
 662 the spindle axis. The area near the pole and in the spindle bulk are marked, divided by a dashed  
 663 line at 1  $\mu\text{m}$ . Error bars are standard error of the mean. (0-1  $\mu\text{m}$ : n=18; 1-2  $\mu\text{m}$ : n=14; 2-3  $\mu\text{m}$ : n=15;  
 664 3-4  $\mu\text{m}$ : n=16; 4-5  $\mu\text{m}$ : n=6) G) KMT lifetime vs. initial position of the line drawn on the spindle  
 665 axis. H) Non-KMT lifetime vs. initial position of the line drawn on the spindle axis.  
 666

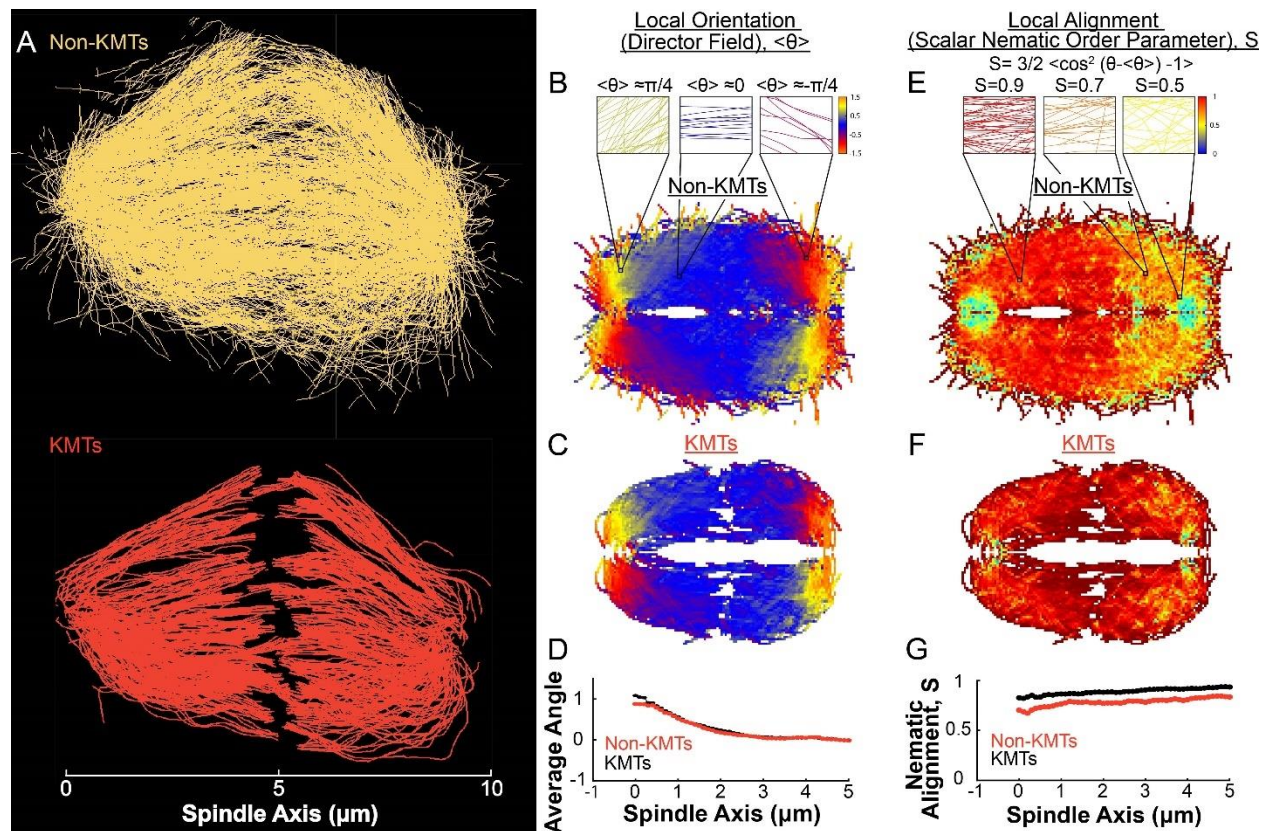

667  
668 **Figure 4: Measuring nematic alignment of non-KMTs and KMTs.** A) Sample from a single  
669 EM reconstruction of non-KMTs (yellow) and KMTS (red). B) Mean local orientation of non-  
670 KMTs average over all theta along the spindle axis. Sample calculations of the local orientation in  
671 three representative pixels are shown above (yellow  $\theta = \pi/4$ , blue  $\theta = 0$ , red  $\theta = -\pi/4$ ). C) Mean local  
672 orientation of KMTs average over all theta along the spindle axis. D) Averaged orientation angle  
673 of KMTs (red) and non-KMTs (black) along the spindle axis. E) Local alignment of the non-  
674 KMTs. Sample calculation of the local orientation in three representative pixels are shown above  
675 (yellow  $\theta = \pi/4$ , blue  $\theta = 0$ , red  $\theta = -\pi/4$ ). F) Local alignment of the KMTs. G) Average alignment of  
676 the non-KMTs (black) and KMTs (red).  
677

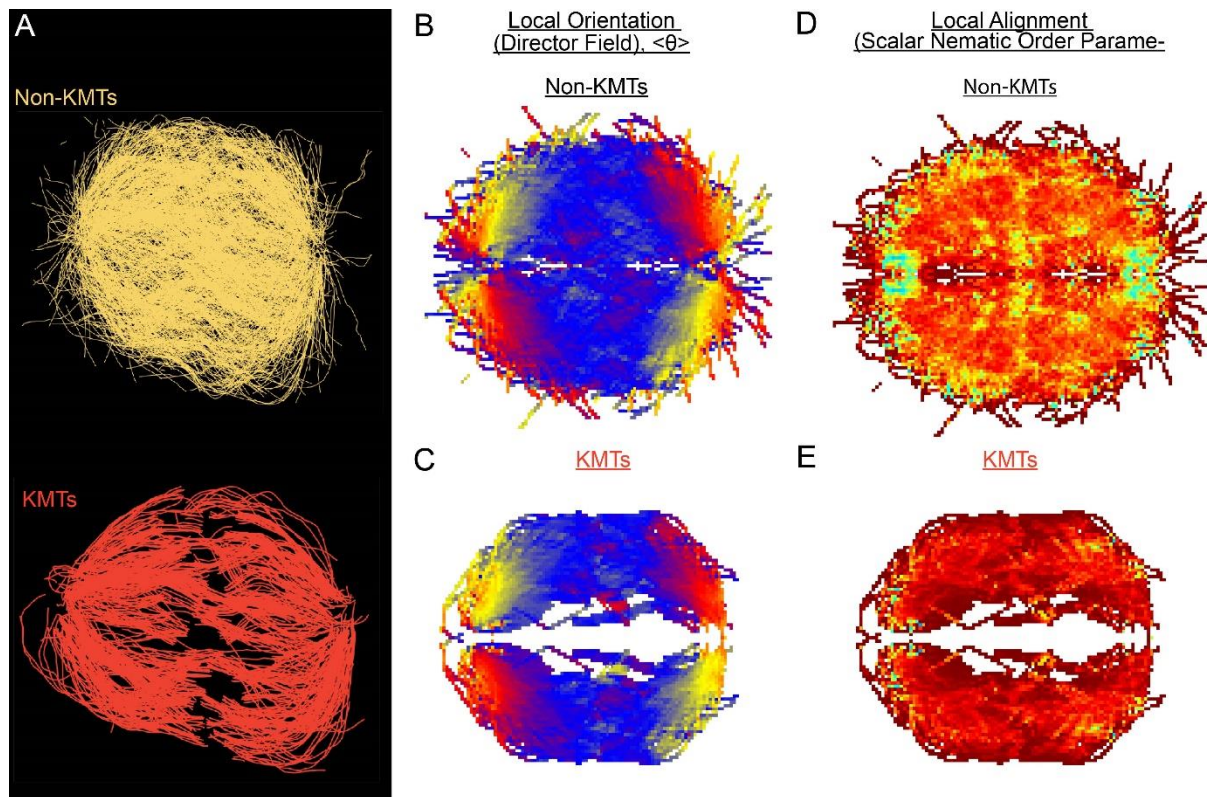

678  
679 **Figure 4s1: Measuring nematic alignment of non-KMTs and KMTs (reconstructed cell #2).**  
680 A) Sample reconstruction from a single EM reconstruction of non-KMTs (yellow) and KMTS  
681 (red). B) Mean local orientation of non-KMTs average over all theta along the spindle axis. C)  
682 Mean local orientation of KMTs average over all theta along the spindle axis. D) Local alignment  
683 of the non-KMTs. E) Local alignment of the KMTs.

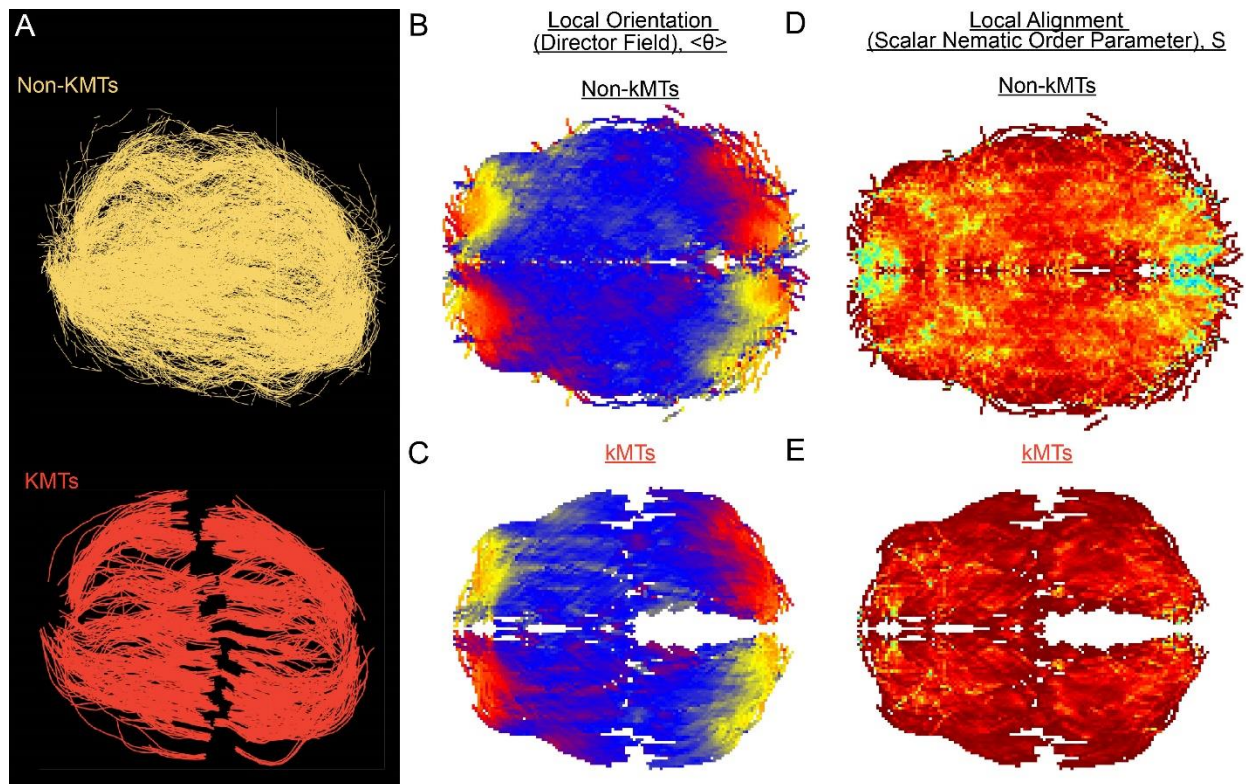

684  
685 **Figure 4s2: Measuring nematic alignment of non-KMTs and KMTs (reconstructed cell #3).**  
686 A) Sample reconstruction from a single EM reconstruction of non-KMTs (yellow) and KMTS  
687 (red). B) Mean local orientation of non-KMTs average over all theta along the spindle axis. C)  
688 Mean local orientation of KMTs average over all theta along the spindle axis. D) Local alignment  
689 of the non-KMTs. E) Local alignment of the KMTs.  
690  
691



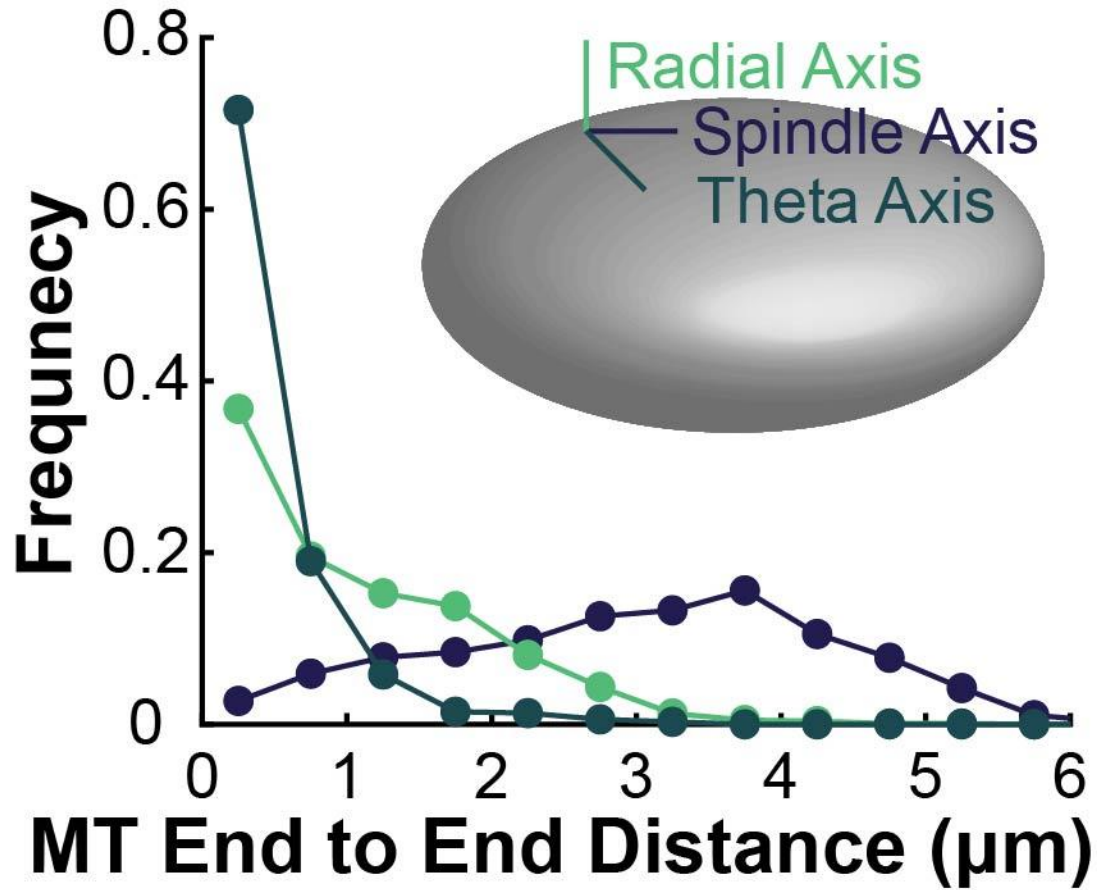

692  
693  
694  
695  
696  
697

**Figure 4s3: Microtubule end to end distance along the radial, spindle and theta axis.** For each KMT, the distance between the plus and minus end of the microtubule along the radial (green), spindle (purple) and theta (cyan) axes and binned as a histogram. The radial, spindle, and theta axis are defined on the cartoon inset.



699

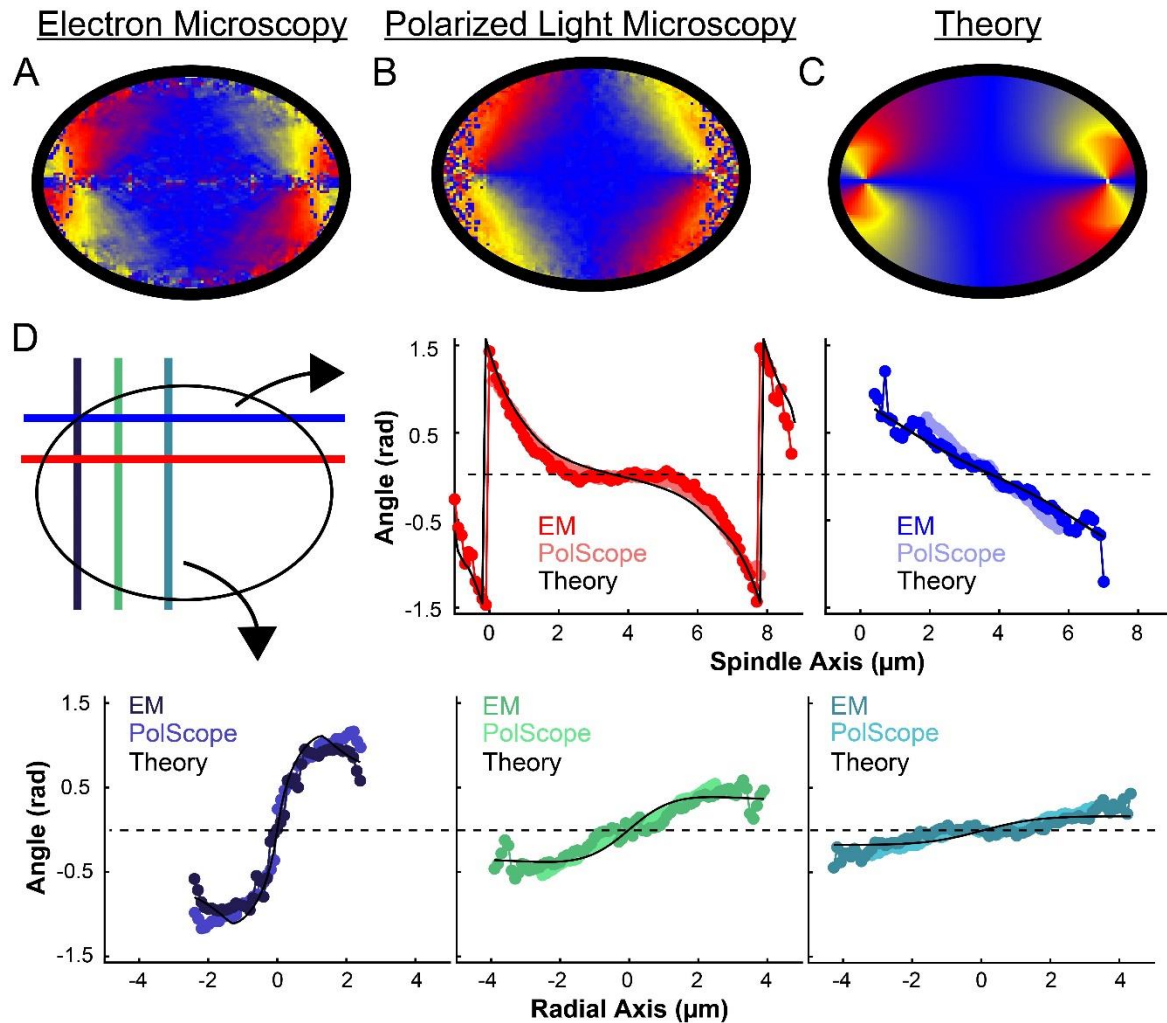

700

701

702 **Figure 5: Experiment and theory of the orientation field of MTs in HeLa spindles.** A)

703 Orientation field of MTs from averaging electron microscopy (EM) reconstructions from three

704 spindles. B) Orientation field of MTs from averaging polarized light microscopy (LC-PolScope)

705 data from eleven spindles. C) A theoretical model of the spindle geometry with tangential

706 anchoring at the elliptical spindle boundary and point defects at the poles. D) Average angle along

707 narrow cuts parallel to the spindle and radial axis (red-lower spindle cut, blue-upper spindle cut

708 purple-radial cut near pole, green-radial cut halfway between pole and kinetochore, teal-radial cut

709 near kinetochore) shows close agreement between orientations from EM, polscope, and theory

710 (black lines).

710

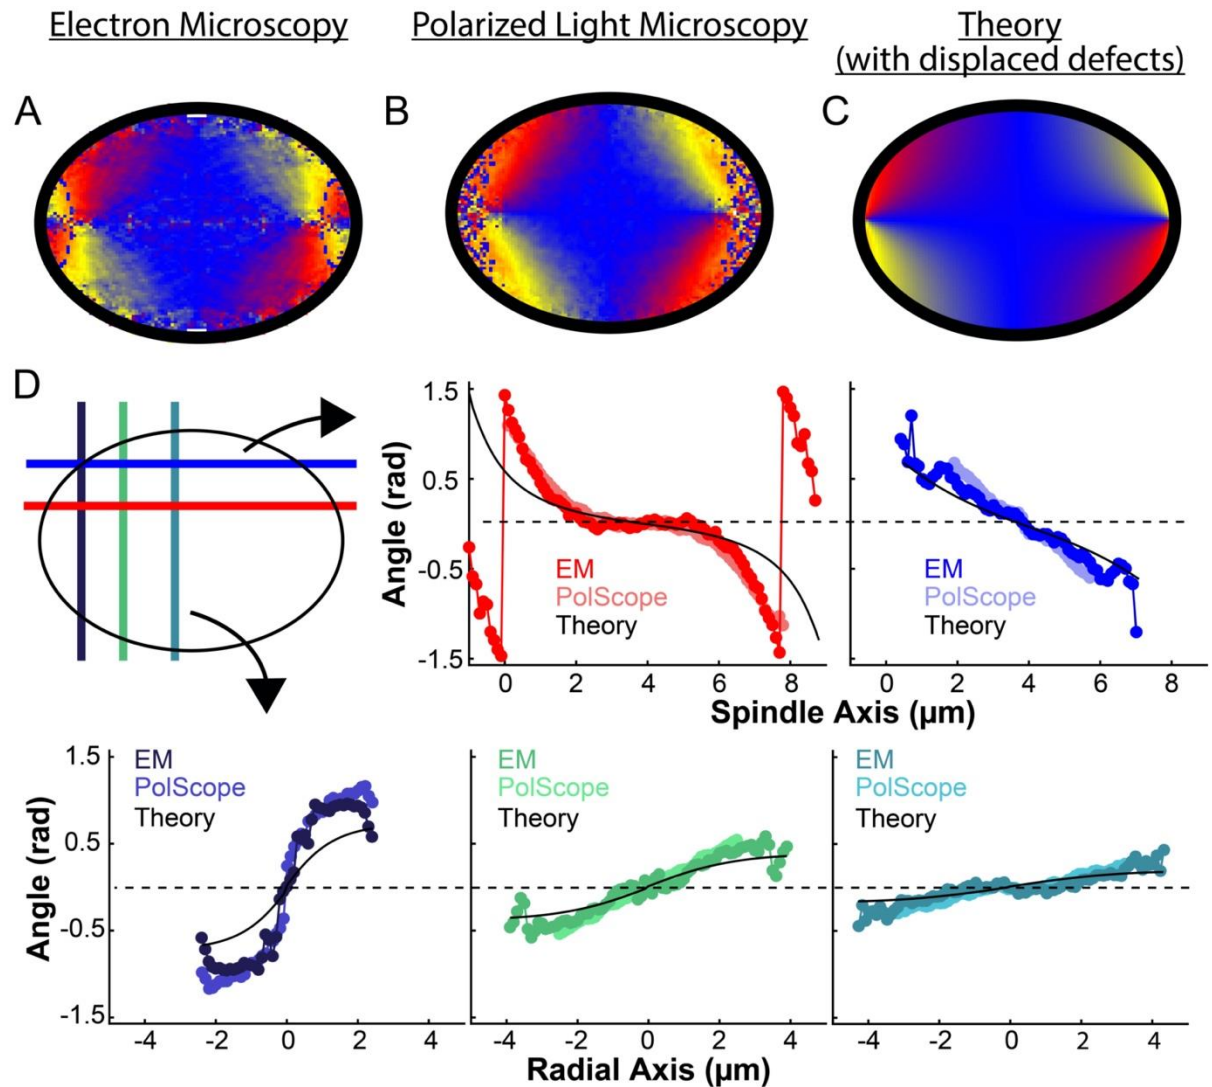

711  
 712 **Figure 5s1: Experimentally measured orientation field of MTs in HeLa spindles compared**  
 713 **to theoretical predictions with point defects localized on the spindle periphery.** A) Orientation  
 714 field of MTs from averaging EM reconstructions from three spindles. B) Orientation field of MTs  
 715 from averaging polarized light microscopy (LC-PolScope) data from eleven spindles. C) A  
 716 theoretical model of the spindle geometry with tangential anchoring at the elliptical spindle  
 717 boundary and point defects on the spindle periphery. D) Average angle along narrow cuts parallel  
 718 to the spindle and radial axis (red-lower spindle cut, blue-upper spindle cut purple-radial cut near  
 719 pole, green-radial cut halfway between pole and kinetochore, teal-radial cut near kinetochore).  
 720

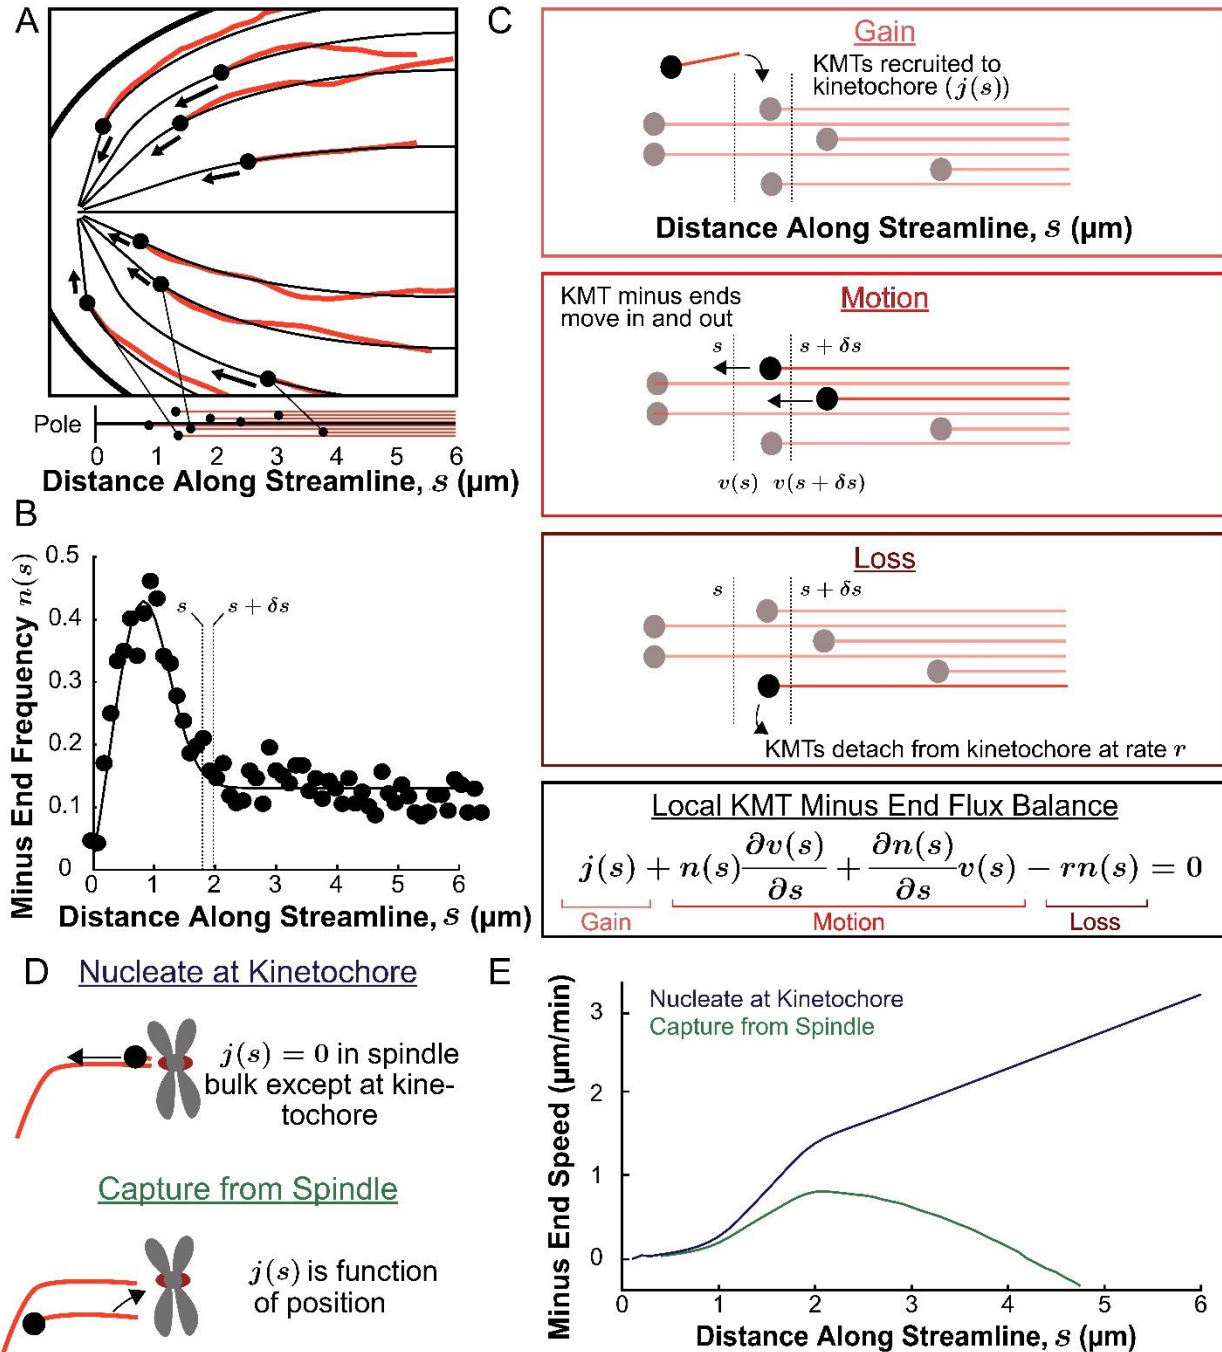

721  
 722 **Figure 6: Predicting the KMT minus end speeds from the steady state distribution of minus**  
 723 **ends along streamlines.** A) Eight representative KMTs from the electron microscopy  
 724 reconstruction (red), with their minus ends (black dots) and the streamlines (thin black lines) these  
 725 minus ends are located on. The distance of these minus ends along the streamlines,  $x$ , are depicted  
 726 (lower). B) Binned histogram, combining data from all three EM reconstructions, of the frequency  
 727 along streamlines of KMT minus ends whose plus ends were upstream of that position. Histogram  
 728 is fit to a Gaussian peaked near the pole and a constant in the spindle bulk (black line). C)  
 729 Schematic depicting cartoon representations of KMT recruitment, minus end position and KMT  
 730 detachment. The three cartoons depict KMT gain, ( $j(s)$ ), KMT minus end motion in (

731  $n(s + \delta s)v(s + \delta s)$  ), KMT minus end motion out ( $n(s)v(s)$ ) and MT loss ( $r_k$ ). Balancing these  
732 fluxes gives the mass conservation equation  $j(s) + v(s)\frac{dn}{ds} + \frac{dv}{ds}n(s) - rn(s) = 0$ . D) Cartoon  
733 showing two models of KMT nucleation 1. nucleate at the kinetochore where  $j(s) = 0$  everywhere  
734 except at the kinetochore and 2. capture from spindle where  $j(s)$  is a function of position in the  
735 spindle. E) Comparison of the predictions of KMT minus end speeds in the nucleate at kinetochore  
736 and capture from spindle models.  
737

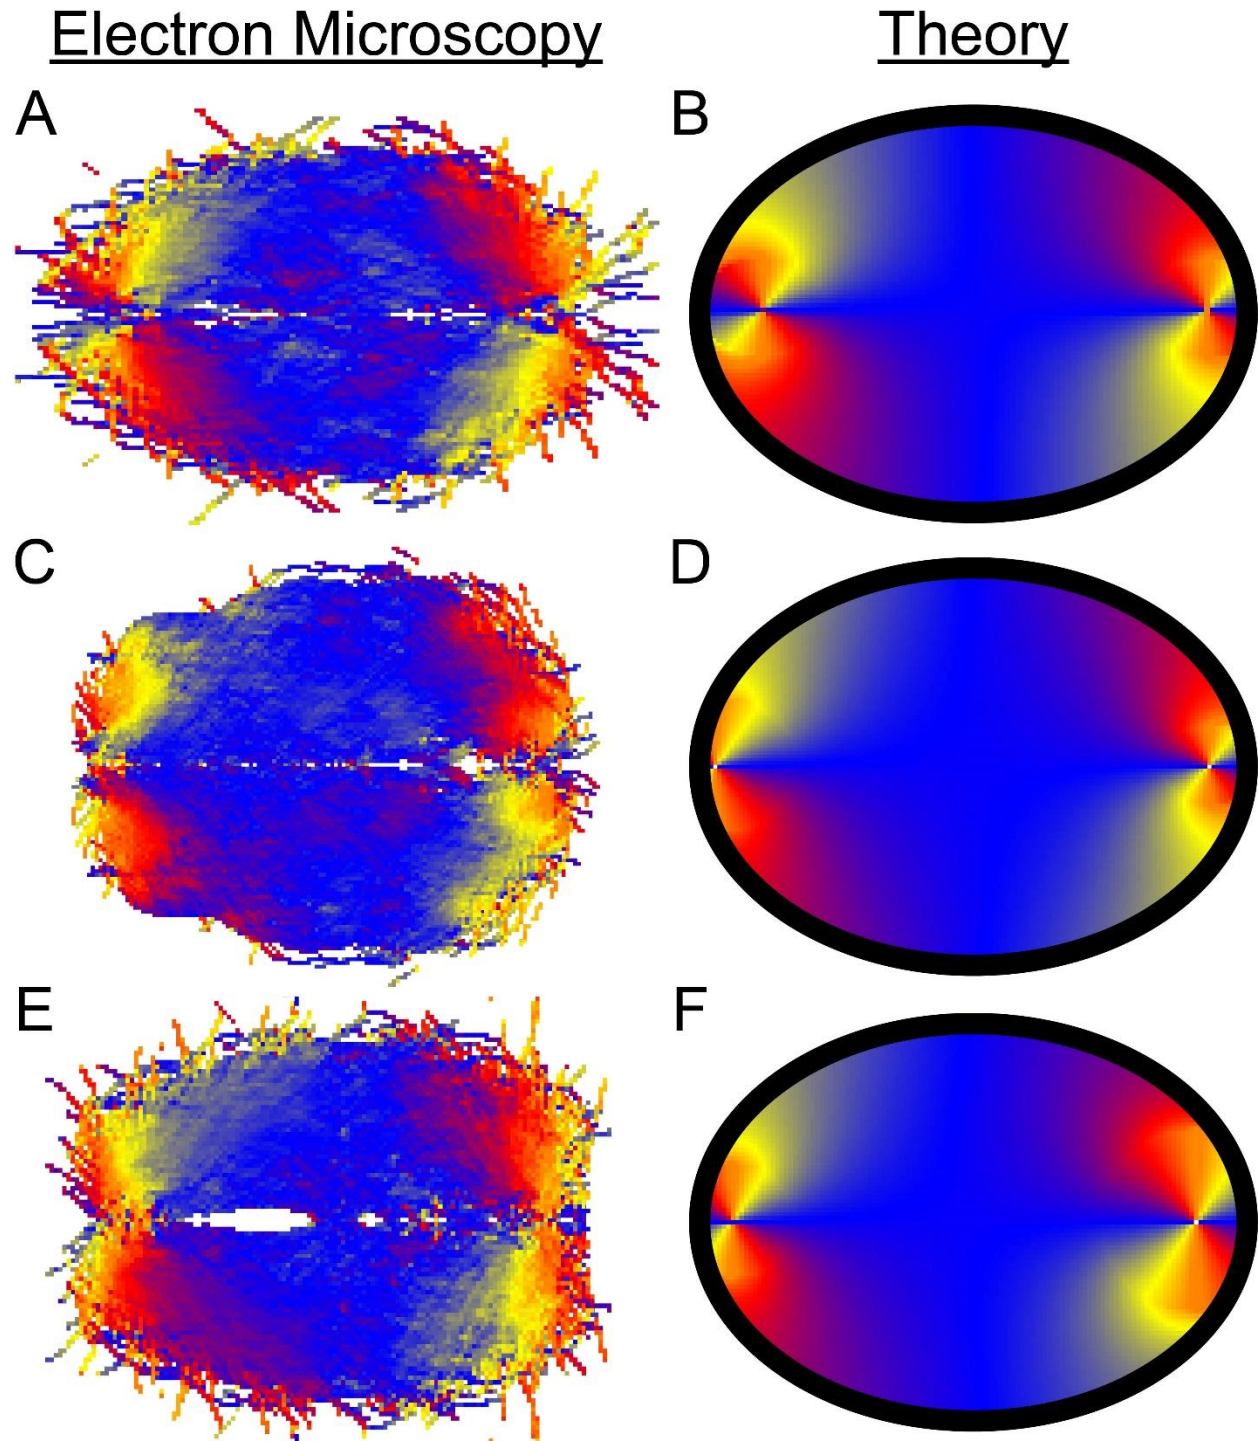

738  
739  
740  
741  
742  
743  
744

**Figure 6s1: Comparison of EM and fit liquid crystal theory for individual reconstructed spindles.** A) Average MT orientation from reconstructed spindle #1. B) Theoretical model of the spindle geometry with tangential anchoring at the elliptical spindle boundary conditions and point defects at the poles for spindle #1. C) EM for spindle #2. D) Theory for Spindle #2. E) EM for spindle #3. F) Theory for spindle #3.

745

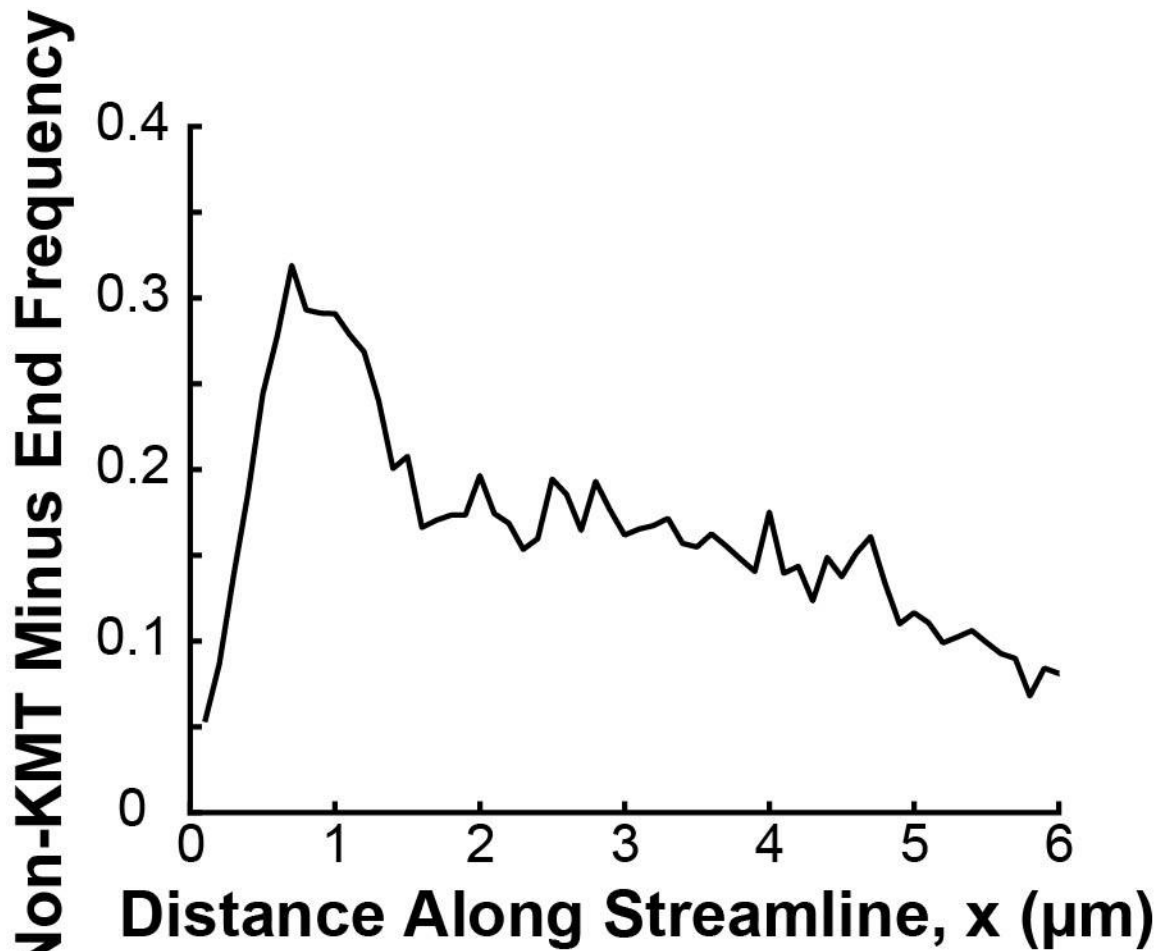

746  
747  
748  
749  
750  
751  
752

**Figure 6s2: Density distribution of non-KMT minus ends along streamlines.** For both ends of each non-KMT, the streamline trajectory from the non-KMT end was calculated by integrating along the nematic director field for that spindle. The distance from each end to the closer pole was then calculated, and the end closer to either pole was taken to be the minus end. The result from all three reconstructed spindles is shown in black.



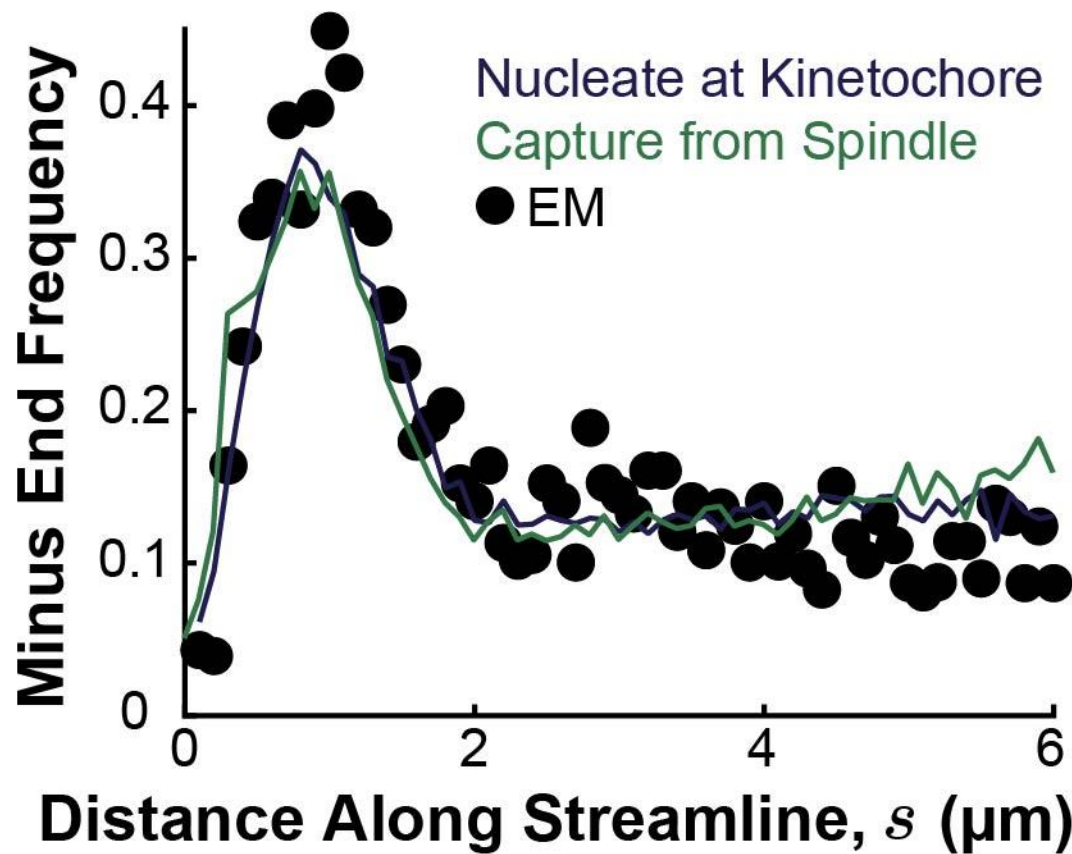

753  
754 **Figure 6s3:** Simulated distribution of minus ends along streamlines using either a nucleate at  
755 kinetochores model (blue) or a capture from spindle recruitment model (green), compared to the  
756 experimentally measured minus distribution from electron microscopy reconstructions (black).  
757 KMTs were nucleated and plus ends were placed at positions drawn from the distribution of  
758 kinetochores along streamlines. For the capture from spindle model, the KMT minus ends were  
759 initially placed along streamlines at positions drawn from the distribution of tubulin density (from  
760 both KMTs and non-KMTs) along streamlines. For the nucleate at kinetochores model, KMT minus  
761 ends were placed at the kinetochores position. Minus ends were then moved along streamlines  
762 according to the velocities compute by either model until equilibrated to steady state.  
763

764

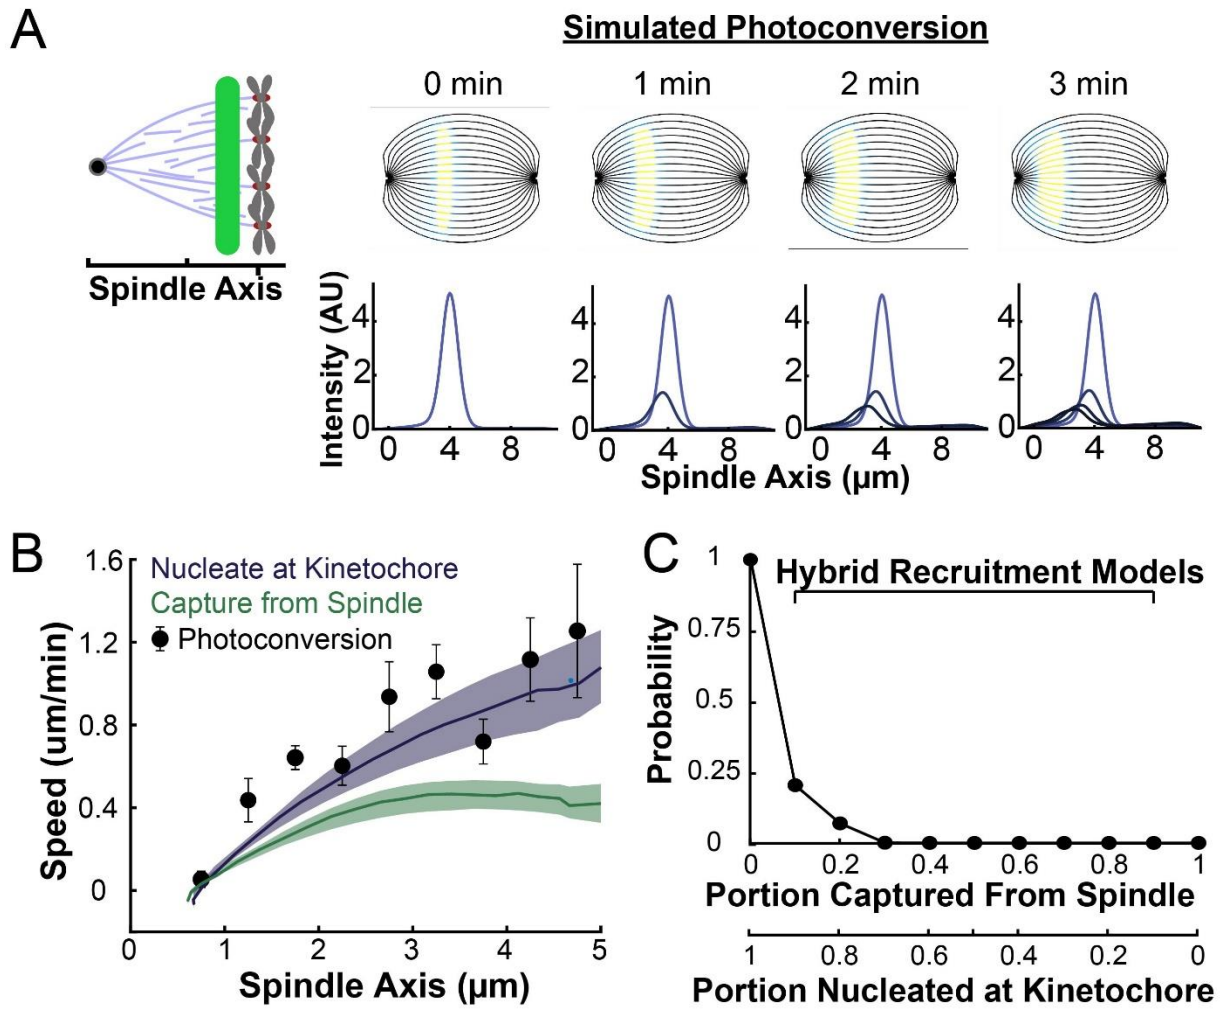

765

766

767 **Figure 7: Model predicted tubulin flux compared to observed values.** A) Sample simulated

768 images and line profiles from a photoconversion simulation using KMT minus end speeds in the

769 nucleate at kinetochores model. B) Comparison of the predicted spatial dependence tubulin flux

770 speed in the nucleate at kinetochores and capture from spindle models. Error bars are standard error

771 of the mean. C) Relative probabilities of hybrid version of the two models.

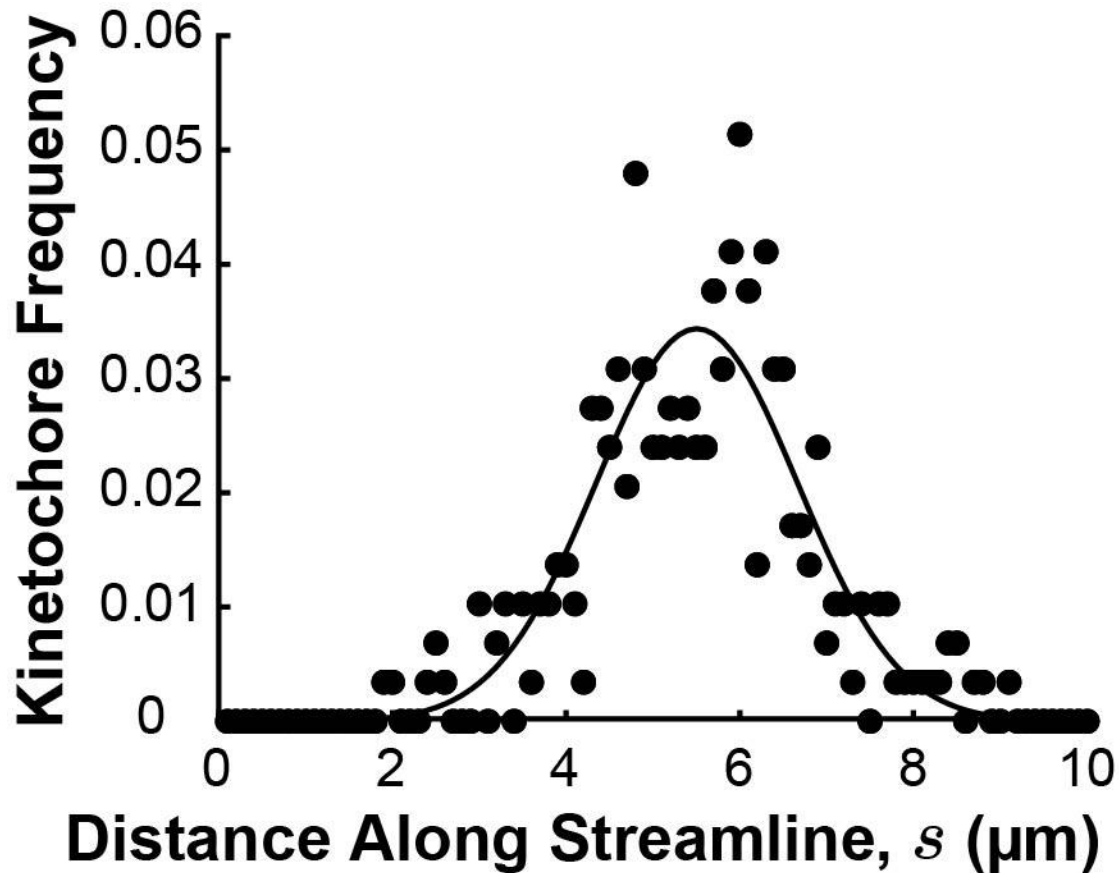

772  
773  
774  
775  
776

**Figure 7s1: Density distribution of kinetochores along streamlines.** The position of kinetochores in each sample cell was projected onto the streamline trajectories computed in figure 6s3 (black dots) and binned from all three cells. The experimental distribution was fit of a Gaussian profile (solid black line)

777

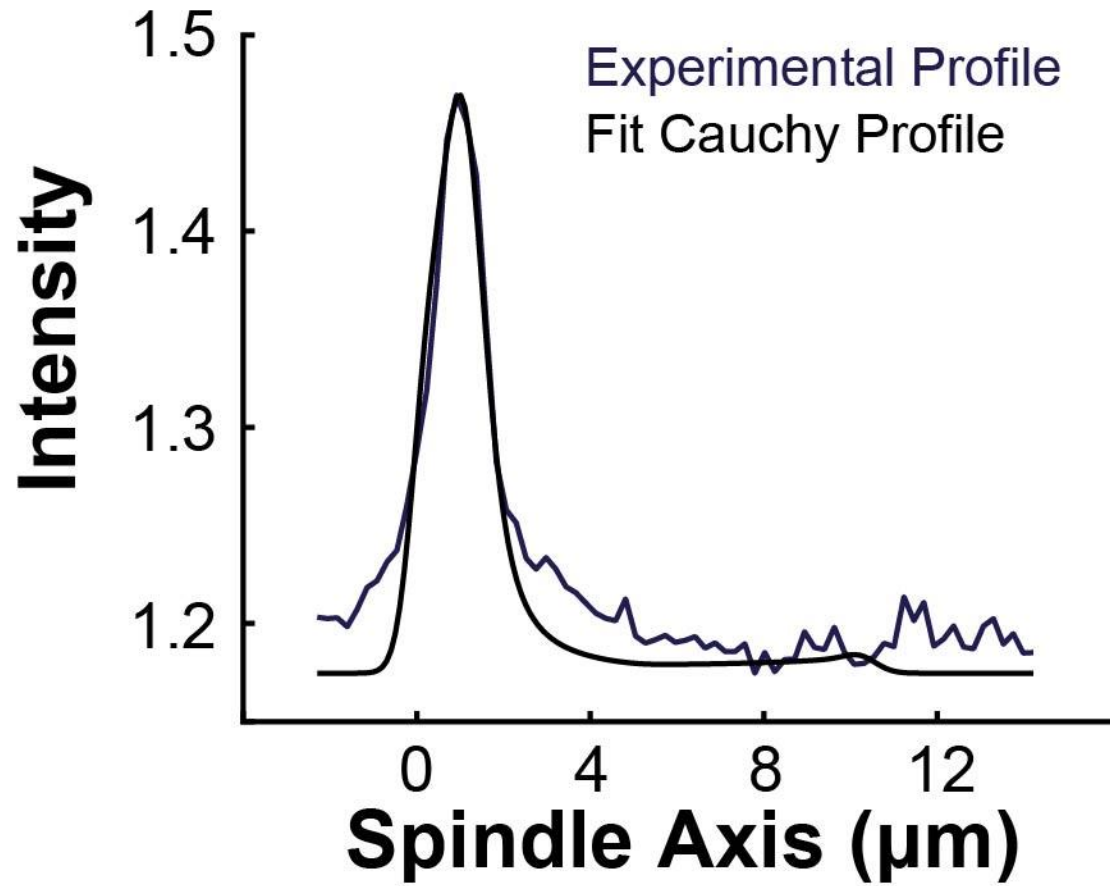

778

779 **Figure 7s2: Sample experimental line profile from a photoconversion experiment and a fit**

780 **modified Cauchy profile** ( $I(x) = \frac{1}{1+(\frac{x-x_0}{w})^a}$ ), The fit profile was generated by drawing a

781 photoconverted line on the simulated spindle (Figure 7A) and projecting the calculated tubulin

782 intensity onto the spindle axis with the modified Cauchy profile with various central positions  $l_0$ ,

783 widths  $w$ , and Cauchy exponent  $a$ . Best fit was determined from a  $\chi^2$  minimization algorithm.

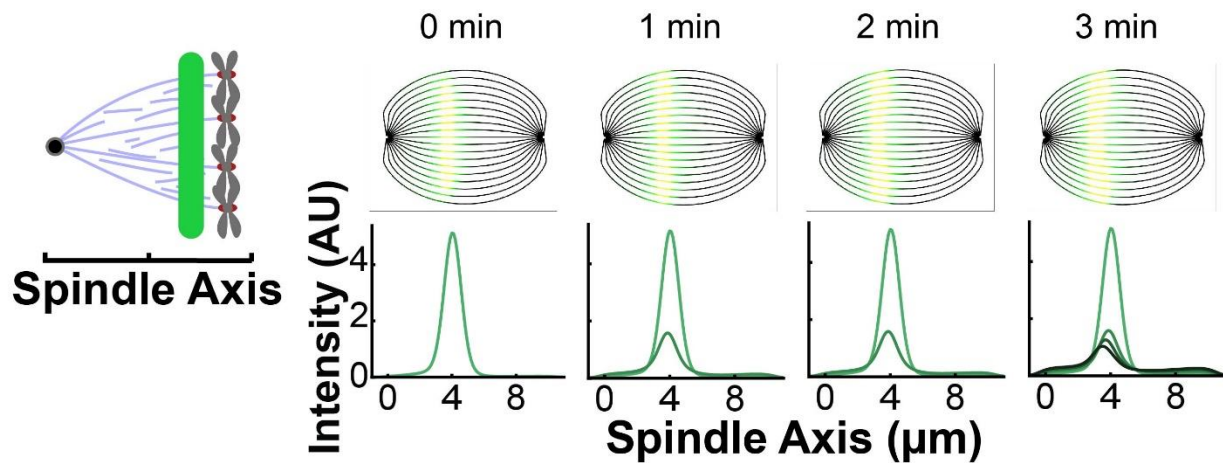

784  
785  
786  
787  
788  
789  
790  
791

**Figure 7s3: Sample simulated images from photoconversion in the capture from spindle model.** For each streamline, a photoconverted line was drawn on the simulated, idealized spindle using the fit modified Cauchy profile from Figure 7s2. The photoconverted tubulin intensity was then projected onto the spindle axis and summed across every streamline. The motion of the photoconverted tubulin along streamlines was calculated using the velocities from the capture from spindle model and is shown at subsequent times (30s, 60s and 90s).

792  
793

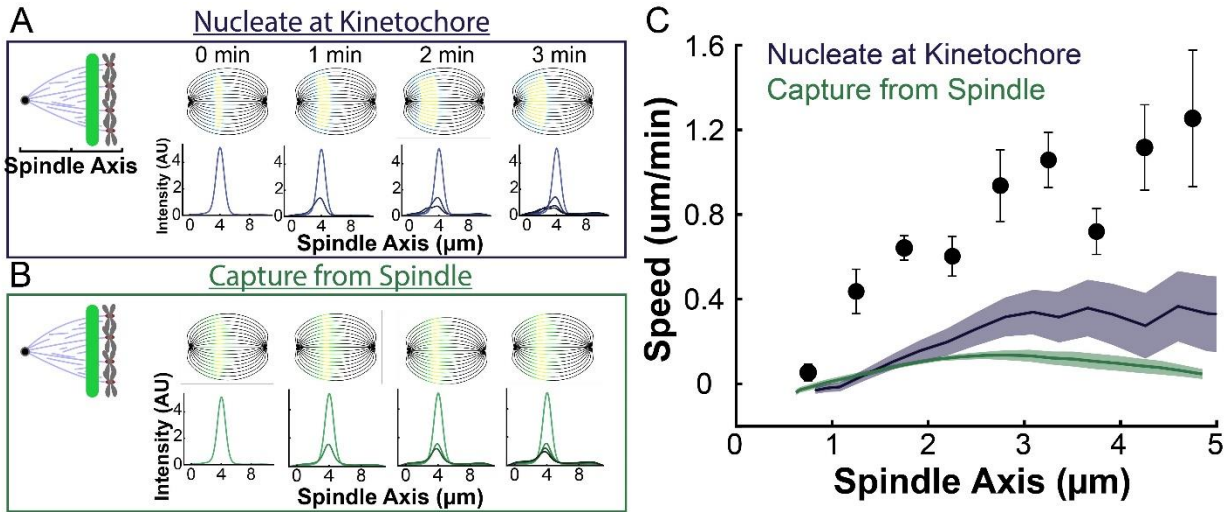

794  
795  
796  
797  
798  
799  
800  
801  
802  
803  
804

**Figure 7s4: Model predicted tubulin flux compared to observed values without minus end depolymerization at the pole.** A) Sample simulated images and line profiles from a photoconversion simulation using KMT minus end speeds in the nucleate at kinetochore model. B) Sample simulated images and line profiles from a photoconversion simulation using KMT minus end speeds in the capture from spindle model. C) Comparison of the predicted spatial dependence tubulin speed in the nucleate at kinetochore and capture from spindle models. Error bars are standard error of the mean.

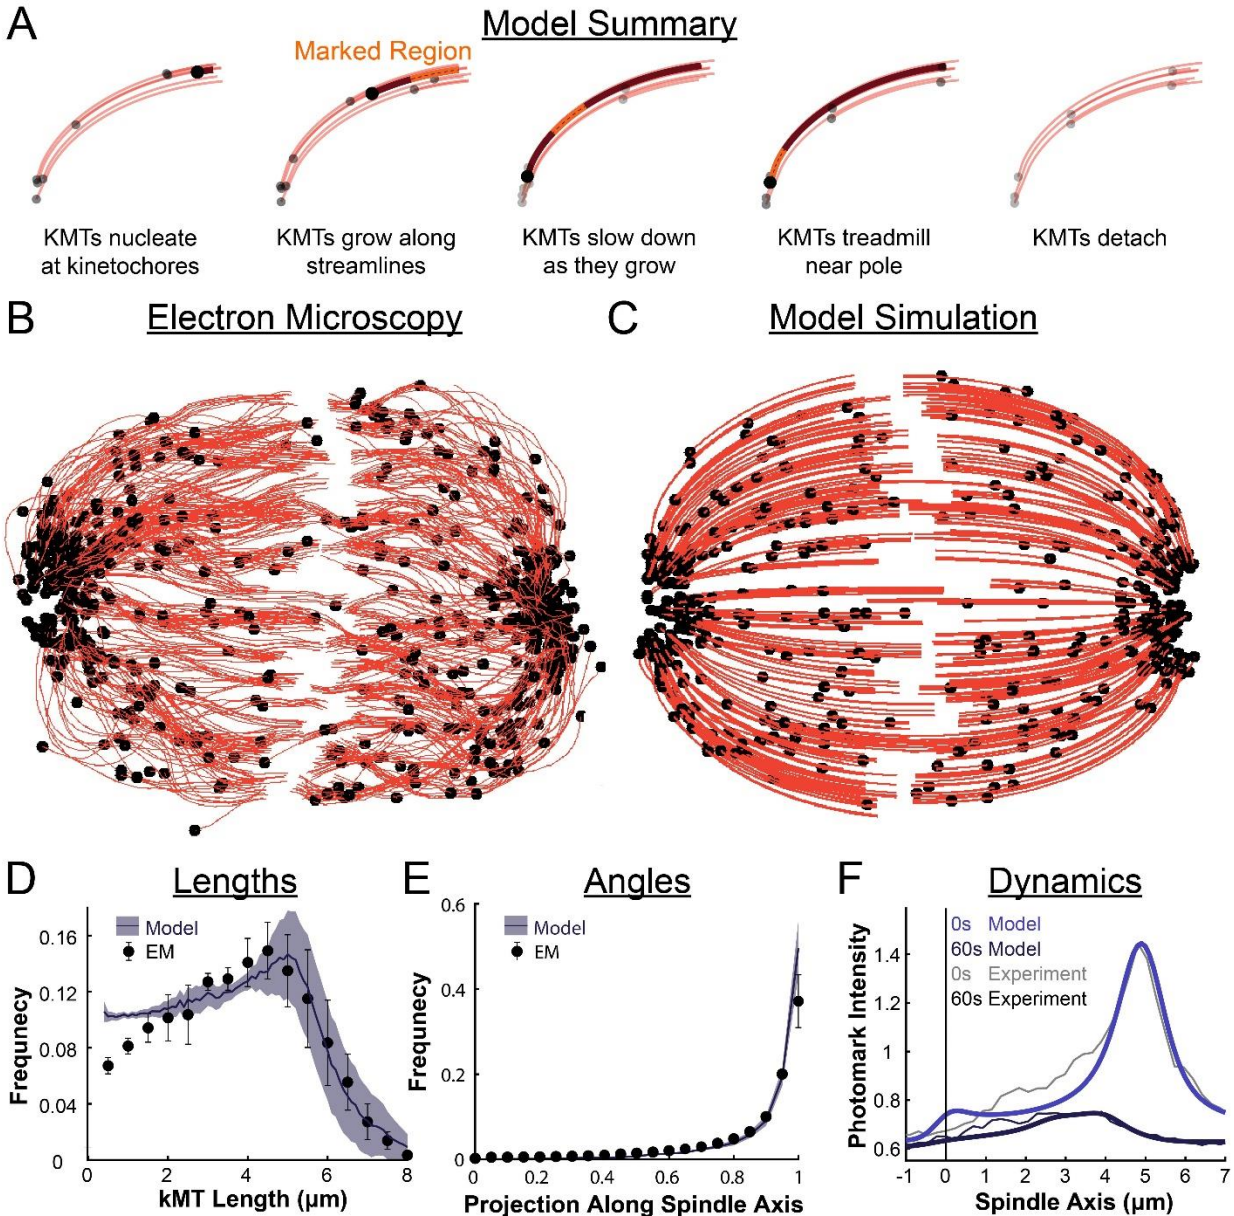

805  
 806 **Figure 8: Summary of a nucleate at kinetochore model of KMT dynamics and structure in**  
 807 **HeLa cells.** A) Summary of the steps of the model: 1. KMTs nucleate at kinetochores 2. KMTs  
 808 grow along streamlines 3. KMTs slow down as they grow 4. KMTs treadmill near the pole 5.  
 809 KMTs detach. B) KMT structure from a sample EM reconstruction (Kiewisz et al., 2021; spindle  
 810 #2). C) Model simulation of the KMT structure given the spindle geometry and kinetochore  
 811 positions. D) Comparison of predicted and observed KMT lengths averaged over all three EM  
 812 cells (Purple-model prediction, black EM data. Error bars are standard error of the mean). E)  
 813 Comparison of predicted and observed KMT angles averaged (Purple-model prediction, black EM  
 814 data. Error bars are standard error of the mean). F) Comparison of predicted and observed  
 815 photoconverted line profiles (blue-model prediction, grey-experiment. Lighter shades are 0s,  
 816 darker shades are 60s).  
 817

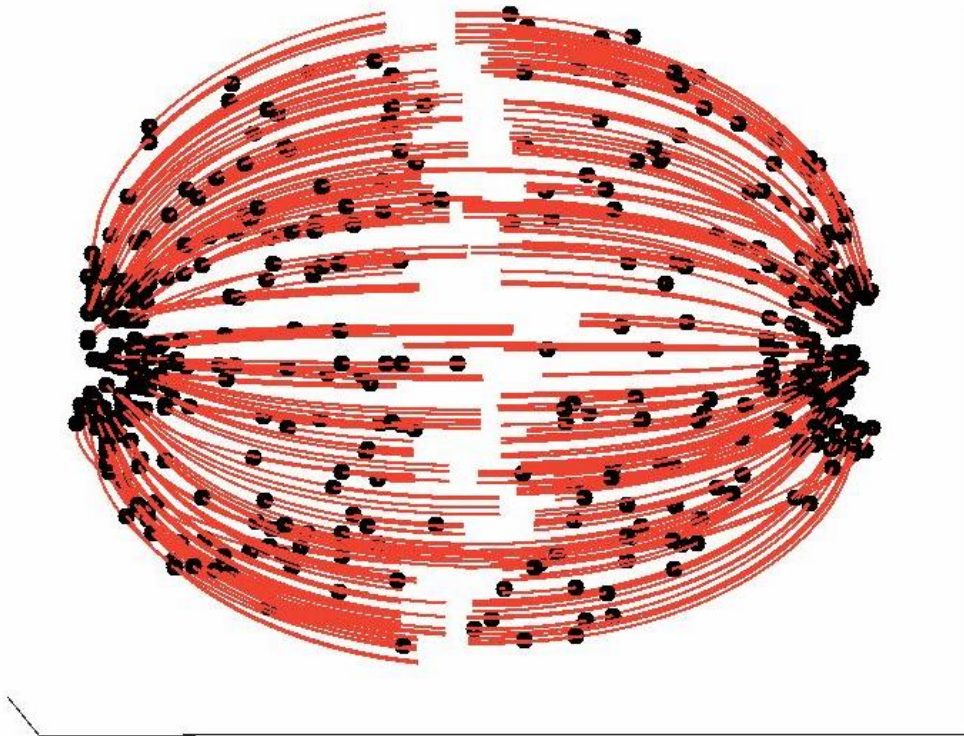

818  
819 **Movie 8s1: Simulated tubulin photoconversion in a 3D model spindle.** Model simulation of the  
820 motion of motion of KMTs in a nucleate at kinetochore model. KMTs are shown in red, KMT  
821 minus ends are shown in black, photoconverted tubulin is shown in yellow. The model runs for 5  
822 minutes of simulation time before the photoconverted line is drawn.  
823



824 **REFERENCES**

825

826 Akiyoshi, B., Sarangapani, K., Powers, A., Nelson, C., Reichow, S., Arellano-Santoyo, H., Gonen  
827 T., Ranish J., Asbury, C., Biggins, S. (2010) “Tension directly stabilizes reconstituted kinetochore-  
828 microtubule attachments”, *Nature* 468:576–579. Doi: 10.1038/nature09594.

829

830 Anjur-Dietrich, M., Kelleher, C., Needleman, D. (2021). “Mechanical Mechanisms of  
831 Chromosome Segregation”, *Cells*, 10(2), 465. Doi: <https://doi.org/10.3390/cells10020465>

832

833 Auckland P, McAinsh AD. 2015. Building an integrated model of chromosome congression. *J.*  
834 *Cell Sci.* **128**, 3363-3374. (10.1242/jcs.169367)

835

836 Bakhom SF, Thompson SL, Manning AL, Compton DA (2009). Genome stability is ensured by  
837 temporal control of kinetochore-microtubule dynamics. *Nat Cell Biol* 11, 27–35.

838

839 Brinkley, D., Cartwright, J. (1975). “Cold-labile and cold-stable microtubules in the mitotic  
840 spindle of mammalian cells”, *Ann. N. Y. Acad. Sci.*, 253, pp. 428-439. doi: 10.1111/j.1749-  
841 6632.1975.tb19218.x.

842

843 Brugués, J., Needleman, D. (2004). “Physical basis of spindle self-organization”111 (52) 18496-  
844 18500. Doi: 10.1073/pnas.1409404111

845

846 Burbank, K., Mitchinson, T., Fisher, D. (2007) “Slide-and-Cluster Models for Spindle Assembly”,  
847 *Current Biology*, 17(16), pp. 1373–1383. DOI 10.1016/j.cub.2007.07.058

848

849 Cassimeris, L., Rieder, C., Rupp, G., Salmon, E. (1990) “Stability of microtubule attachment to  
850 metaphase kinetochores in PtICi cells”, *J Cell Sci*, 96(1), pp.9-15. DOI: 10.1242/jcs.96.1.9.

851

852 Cimini D, Howell BJ, Maddox P, Kodjakov A, Degraffi F, Salmon ED. (2001) “Merotelic  
853 kinetochore orientation is a major mechanism of aneuploidy in mitotic mammalian tissue cells”, *J*  
854 *Cell Biol.* 1(53), pp. 517–528. Doi: 10.1083/jcb.153.3.517.

855

856 Cheerambathur D. K., Prevo B., Hattersley N., Lewellyn L., Corbett K. D., Oegema K. and  
857 Desai A. (2017). Dephosphorylation of the Ndc80 tail stabilizes kinetochore-microtubule  
858 attachments via the Ska complex. *Dev. Cell* 41, 424-437 e424. 10.1016/j.devcel.2017.04.013

859

860 Cheeseman IM, Chappie JS, Wilson-Kubalek EM, Desai A. The conserved KMN network  
861 constitutes the core microtubule-binding site of the kinetochore. *Cell*. 2006;127:983–997.

862

863 Chiang T, Duncan FE, Schindler K, Schultz RM, Lampson MA. 2010. Evidence that weakened  
864 centromere cohesion is a leading cause of age-related aneuploidy in oocytes. *Curr. Biol.* **20**,  
865 1522-1528. (10.1016/J.CUB.2010.06.069)

866

867 Compton, D. (2017). “Mechanisms of Aneuploidy”, *Curr Opin Cell Biol.*23(1), pp. 109–113.  
868 doi: 10.1016/j.ceb.2010.08.007

869

- 870 David, A., Roudot, P., Legant, W., Betzig, E., Danuser, G., Gerlich, D. (2019) “Augmin  
871 accumulation on long-lived microtubules drives amplification and kinetochore-directed growth”,  
872 *J Cell Biol*, 218(7), pp. 2150-2168. doi: 10.1083/jcb.201805044.  
873
- 874 De Gennes, P., Post, J. (1993) “The Physics of Liquid Crystals”,. ISBN: 0198517858.  
875
- 876 DeLuca JG, et al. Kinetochore microtubule dynamics and attachment stability are regulated by  
877 Hec1. *Cell*. 2006;127:969–982.  
878
- 879 DeLuca, J. (2010). “Chapter 4 - Kinetochore–Microtubule Dynamics and Attachment Stability”,  
880 *Meth Cell Biol*, 97, pp.53-69. Doi: 10.1016/S0091-679X(10)97004-0.  
881
- 882 DeLuca K, Lens SM, DeLuca JG (2011). Temporal changes in Hec1 phosphorylation control  
883 kinetochore-microtubule attachment stability during mitosis. *J Cell Sci*. pp. 124:622–634. DOI:  
884 10.1242/jcs.072629.  
885
- 886 Doi M, Edwards SF. (1988) “The Theory of Polymer Dynamics” Oxford Univ Press, New York.  
887
- 888 Dudka D, Noatynska A, Smith CA, Liaudet N, McAinsh AD, Meraldi P: Complete microtubule–  
889 kinetochore occupancy favours the segregation of merotelic attachments. *Nat Commun* 2018,  
890 9:2042.  
891
- 892 Dumont, S., Mitchison, T. (2004). “Compression regulates spindle length by a mechanochemical  
893 switch at the poles”, *Current Biology*, 19, pp.1086-1095.  
894
- 895 Elting, MW., Prakash, M., Udy, D., Dumont, S. (2017). “Mapping Load-Bearing in the  
896 Mammalian Spindle Reveals Local Kinetochore Fiber Anchorage that Provides Mechanical  
897 Isolation and Redundancy” *Curr Biol* 27, 1–11. DOI:  
898
- 899 Elting, MW., Hueschen, C., Udy, D., Dumont, S. (2014). “Force on spindle microtubule minus  
900 ends moves chromosomes” *J Cell Biol* 206(2), pp. 245-256. DOI: 10.1083/jcb.201401091.  
901
- 902 Funabiki H. 2019. Correcting aberrant kinetochore microtubule attachments: a hidden regulation  
903 of Aurora B on microtubules. *Curr. Opin. Cell Biol.* **58**, 34-41.  
904
- 905 Gadde, S., Heald, R. (2004). “Mechanisms and Molecules of the Mitotic Spindle”, *Current*  
906 *Biology*, 14(18), pp.797-805. DOI: 10.1016/j.cub.2004.09.021.  
907
- 908 Gao, Y., Kilfoil, M. (2009). “Accurate detection and complete tracking of large populations of  
909 features in three dimensions”, *Optics Express*, 17(6), pp. 4685-4704. Doi:  
910 10.1364/OE.17.004685  
911
- 912 Godek, K., Kabeche, L., Compton D. (2015) “Regulation of kinetochore-microtubule attachments  
913 through homeostatic control during mitosis” *Nature Reviews Molecular Cell Biology* 16, pp. 57–  
914 64. Doi: 10.1038/nrm3916.  
915

- 916 Gorbisky GJ, Borisy GG. (1989) “Microtubules of the kinetochore fiber turn over in metaphase but  
917 not in anaphase”. *J Cell Biol.* 109(2), pp.653-62. doi: 10.1083/jcb.109.2.653.volume/  
918 Hayden, J., Bowser, S., Rieder, C. (1990) “Kinetochores Capture Astral Microtubules during  
919 Chromosome Attachment to the Mitotic Spindle: Direct Visualization in Live Newt Lung Cells”,  
920 *Journal of Cell Biology*, 111(3), pp. 1039-1045 doi: 10.1083/jcb.111.3.1039.  
921  
922 Heald, R., Khodjakov, A. (2015) “Thirty years of search and capture: The complex simplicity of  
923 mitotic spindle assembly”, *J Cell Biol* 211 (6): 1103–1111. Doi: 10.1083/jcb.201510015.  
924  
925 Huitorel, P., Kirschner, M. (1988). “The polarity and stability of microtubule capture by the  
926 kinetochore”, *J Cell Biol*, 106(1):151-9. doi: 10.1083/jcb.106.1.151.  
927  
928 Jo, M., Kusano, Y., Hirota, T. (2001). “Unraveling pathologies underlying chromosomal  
929 instabilities in cancers” *Cancer Sci* 112(8) pp.2975-2983 DOI: 10.1111/cas.14989.  
930  
931 Kabeche, L., Compton, D. (2013). “Cyclin A Regulates Kinetochore-Microtubules to Promote  
932 Faithful Chromosome Segregation”, 502(7469): 110–113.doi: 10.1038/nature12507.  
933  
934 Kamasaki, T., O’Toole, E., Kita, S., Osumi, M., Usukura, J., McIntosh, J., Goshima, G. (2013).  
935 “Augmin-dependent microtubule nucleation at microtubule walls in the spindle” *J Cell Biol*,  
936 202(1), pp. 25-33. doi: 10.1083/jcb.201304031  
937  
938 Kapitein, L., Peterman, E., Kwok, B. Kim, J., Kapoor T., Schmidt, C. (2005). “The bipolar mitotic  
939 kinesin Eg5 moves on both microtubules that it crosslinks.” *Nature* 435, pp.114–118. DOI:  
940 10.1038/nature03503  
941  
942 Khojakov, A., Cole, R., Oakley, B., Rieder, C. (2000). “Centrosome-independent mitotic spindle  
943 formation in vertebrates”, *Curr Biol*, 10(2), pp. 59-67. doi: 10.1016/s0960-9822(99)00276-6.  
944  
945 Khojakov, A., Copenagle, L., Gordon, M., Compton, D., Kapoor, T. (2003) “Minus-end capture  
946 of preformed kinetochore fiber contributes to spindle morphogenesis” 160(5), 671–683. Doi:  
947 10.1083/jcb.200208143  
948  
949 Kiewisz, R., Fabig, G., Conway, W., Needleman D., Müller-Reichert, T. (2021) „Three-  
950 dimensional structure of kinetochore-fibers in human mitotic spindles”. Submitted to *bioRxiv*.  
951  
952 Krenn V, Musacchio A (2015). The Aurora B kinase in chromosome bi-orientation and spindle  
953 checkpoint signaling. *Front Oncol* 5, 225.  
954  
955 LaFountain, J., Oldenborug, R. (2014). “Kinetochore-driven outgrowth of microtubules is a central  
956 contributor to kinetochore fiber maturation in crane-fly spermatocytes”, *Mol Biol Cell* 25(9), pp.  
957 1437-45. doi: 10.1091/mbc.E14-01-0008.  
958  
959 Lambert, A., Bajer, A. (1977) “Microtubule distribution and reversible arrest of chromosome  
960 movements induced by low temperature”, *Cytobiologie*, 15(1), pp.1-23. DOI:  
961

- 962 Lampson, M., Grishchuk, E. (2017). “Mechanisms to Avoid and Correct Erroneous Kinetochores-  
963 Microtubule Attachments” *Biology (Basel)*. (1) pp. 1. doi: 10.3390/biology6010001  
964
- 965 Long AF, Kuhn J, Dumont S. The mammalian kinetochore-microtubule interface: robust  
966 mechanics and computation with many microtubules. *Current Opinion in Cell Biology* 60, 60–67  
967 (2019).  
968
- 969 Long, A., Suresh, P., Dumont, S. (2020). “Individual kinetochore-fibers locally dissipate force to  
970 maintain robust mammalian spindle structure” *J Cell Biol*, 219 (8), DOI: 10.1083/jcb.201911090.  
971 Maiato, H., Rieder, C., Khodjakov, A. (2004a) “Kinetochore-driven formation of kinetochore  
972 fibers contributes to spindle assembly during animal mitosis” *J Cell Bio*, 167 (5), pp. 831-40. Doi:  
973 10.1083/jcb.200407090  
974
- 975 Maiato, H., DeLuca, J., Salmon, E., Earnshaw W. (2004b) “The dynamic kinetochore-microtubule  
976 interface” *Journal of Cell Science* 117 pp. 5461–5477. Doi: 10.1242/jcs.01536 .  
977
- 978 McDonald, K.L., E.T. O’Toole, D.N. Mastronarde, and J.R. McIntosh. 1992. Kinetochore  
979 microtubules in PTK cells. *J. Cell Biol.* 118:369–383. DOI: 10.1083/jcb.118.2.369  
980
- 981 McEwen, B., Heagle, A., Cassels, G., Buttle, K., Rieder C. (1997) “Kinetochore fiber maturation  
982 in PtK1 cells and its implications for the mechanisms of chromosome congression and anaphase  
983 onset” *The Journal of Cell Biology* 137 pp. 1567–1580. Doi: 10.1083/jcb.137.7.1567.  
984
- 985 McIntosh, J., Molodtsov, M., Ataullakhanov, F. (2012). “Biophysics of mitosis”, 45(2), pp. 147-  
986 207. doi: 10.1017/S0033583512000017  
987
- 988 Mitchinson, T., Kirschaner, M. (1984) “Dynamic instability of microtubule growth” *Nature*,  
989 314(5991) pp, 237-242. doi: 10.1038/312237a0.  
990
- 991 Mitchinson, T., Kirschaner, M. (1985a). “Properties of the Kinetochore In Vitro. I. Microtubule  
992 Nucleation and Tubulin Binding”, *J Cell Biol* ,101(3), pp. 755-65. doi: 10.1083/jcb.101.3.755.  
993
- 994 Mitchinson, T., Kirschner, M. (1985b). “Properties of the kinetochore in vitro. II. Microtubule  
995 capture and ATP- dependent translocation”, *J Cell Biol.* 101(3): 766–777. doi:  
996 10.1083/jcb.101.3.766.  
997
- 998 Mitchinson, T., Kirschaner, M. (1986) “Beyond self-assembly: from microtubules to  
999 morphogenesis” *Cell*, 45(3) pp, 329-42. doi: 10.1016/0092-8674(86)90318-1.  
1000
- 1001 Mitchison, T. (1989). “Polewards microtubule flux in the mitotic spindle: Evidence from  
1002 photoactivation of fluorescence”, *J. Cell Biol.*, 109(1989), pp. 637-652 doi:  
1003 10.1083/jcb.109.2.637..  
1004
- 1005 Mitchison, T., Salmon, E. (1992). “Poleward kinetochore fiber movement occurs during both  
1006 metaphase and anaphase-A in newt lung cell mitosis” *J Cell Biol* 119 (3), pp. 569–582. DOI:  
1007 10.1083/jcb.119.3.569.

1008  
1009 Monda JK, Cheeseman IM: The kinetochore-microtubule interface at a glance. *J Cell Sci* 2018,  
1010 131.  
1011 Neahring L, Cho N, Dumont S. (2021). “Opposing motors provide mechanical and functional  
1012 robustness in the human spindle”. *Dev Cell*. 56, 1-13. DOI: 10.1016/j.devcel.2021.09.011.  
1013  
1014 Nicklas, R., Ward, S.; (1994) “Elements of error correction in mitosis: microtubule capture,  
1015 release, and tension”, *The Journal of Cell Biology*, 126 pp. 1241–1253. Doi:  
1016 10.1083/jcb.126.5.1241 .  
1017  
1018 Oldenbourg, Rudolf. (1998) "Polarized light microscopy of spindles." *Methods in Cell Biology* 61  
1019 (1998): 175-208.  
1020  
1021 Oldenbourg, Rudolf. (2005) "Polarization microscopy with the LC-PolScope." *Live cell imaging:*  
1022 *A laboratory manual* (2005): 205-237.  
1023  
1024 O’Toole E, Morphew M, McIntosh JR. 2020. Electron tomography reveals aspects of spindle  
1025 structure important for mechanical stability at metaphase. *Mol Biol Cell* **31**:184–195.  
1026 doi:10.1091/mbc.E19-07-0405.  
1027  
1028 Oriola, D., Needleman, D., Brugués, J. (2018). “The Physics of the Metaphase Spindle”, *Annu Rev*  
1029 *Biophys*, 47, pp. 655-673. doi: 10.1146/annurev-biophys-060414-034107.  
1030  
1031 Oriola, D., Jülicher, F., Brugués, J. (2020). “Active forces shape the metaphase spindle through a  
1032 mechanical instability” *PNAS*. 117 (28) 16154-16159. Doi: 10.1073/pnas.2002446117.  
1033  
1034 Petry, S. (2016) “Mechanisms of Mitotic Spindle Assembly”, *Review Annu Rev Biochem*. 85:659-  
1035 83. doi: 10.1146/annurev-biochem-060815-014528.  
1036  
1037 Pesenti ME, Prumbaum D, Auckland P, Smith CM, Faesen AC, Petrovic A, Erent M, Maffini S,  
1038 Pentakota S, Weir JR et al.: Reconstitution of a 26-subunit human kinetochore reveals  
1039 cooperative microtubule binding by CENP-OPQUR and NDC80. *Mol Cell* 2018, 71:923-939.  
1040 DOI:  
1041  
1042 Piehl M, Cassimeris L. (2003). “Organization and dynamics of growing microtubule plus ends  
1043 during early mitosis”. *Mol Biol Cell*. 14(3), pp. 916-25. DOI: 10.1091/mbc.e02-09-0607  
1044  
1045 Prosser, S., Pelletier, L. (2017). “Mitotic spindle assembly in animal cells: a fine balancing act”,  
1046 18:187-2021. Doi: 10.1038/nrm.2016.162.  
1047  
1048 Redemann S, Baumgart J, Lindow N, Shelley M, Nazockdast E, Kratz A, Prohaska S, Bruges J,  
1049 Furthauer S, Muller-Reichert T (2017). *C. elegans* chromosomes connect to centrosomes by  
1050 anchoring into the spindle network. *Nat Commun* 8, 15288.  
1051

- 1052 Renda, F., Khodjakov, A. (2021) “Role of spatial patterns and kinetochore architecture in spindle  
1053 morphogenesis”, *Seminars in Cell and Developmental Biology*; 16(03). Doi:  
1054 10.1016/j.semcd.2021.03.016  
1055
- 1056 Rieder, C., Bajer, A. (1977). “Heat-induced reversible hexagonal packing of spindle  
1057 microtubules”, *J Cell Biol*, 74(3), pp.717-725. DOI: [10.1083/jcb.74.3.717](https://doi.org/10.1083/jcb.74.3.717)  
1058
- 1059 Rieder, C. (1981). “The structure of the cold-stable kinetochore fiber in metaphase PtK1 cells”,  
1060 *Chromosoma*, 84, pp. 145-158. doi: 10.1007/BF00293368.  
1061
- 1062 Rieder, C. (1982) “The formation, structure, and composition of the mammalian kinetochore and  
1063 kinetochore fiber” *International Review of Cytology* 79, pp. 1-58. Doi: 10.1016/S0074-  
1064 7696(08)61672-1 .  
1065
- 1066 Rieder, C., and Alexander, S. (1990) “Kinetochore fibers are transported poleward along a single astral  
1067 microtubule during chromosome attachment to the spindle in newt lung cells”, 110(1), pp. 81–95.  
1068 doi: 10.1083/jcb.110.1.81  
1069
- 1070 Risteski, P., Jagrić, M., Božan, D., Bosilj, A., Tolić, I (2021). “Coordinated poleward flux of sister  
1071 kinetochore fibers drives chromosome alignment” *bioRxiv*. DOI: [.org/10.1101/2020.12.30.424837](https://doi.org/10.1101/2020.12.30.424837)  
1072 (2021).  
1073
- 1074 Salmon, E.D., Goode, D., Mangel, T.K., Bonar, D.B. (1976). “Pressure-induced depolymerization  
1075 of spindle microtubules: III. Differential stability in HeLa cells” *J Cell Biol*, 69(2), pp.443-454.  
1076 doi: 10.1083/jcb.69.2.443  
1077
- 1078 Sikirzhyski, V., Renda, F., Tikhonenko, I., Valentin Magidson, V., McEwen, D., Khodjakov, A.  
1079 (2018). “Microtubules assemble near most kinetochores during early prometaphase in human  
1080 cells”, *J Cell Biol*, 217(8):2647-2659. doi: 10.1083/jcb.201710094.  
1081
- 1082 Strasburger, E. *Zellbildung und Zelltheilung “Cell Formation and Cell Division”*; Gustav  
1083 Fischer: Jena, Germany, 1880.  
1084
- 1085 Steblyanko, Y., Rajendraprasad, G., Osswald, M., Eibes, S., Jacome, A., Geley, S., Pereira, A.,  
1086 Maiato, H., Barisic, M. (2020). “Microtubule poleward flux in human cells is driven by the  
1087 coordinated action of four kinesins”, *EMBO*, 39(23):e105432. doi: 10.15252/embj.2020105432.  
1088
- 1089 Tanaka TU, Rachidi N, Janke C, Pereira G, Galova M, Schiebel E, Stark MJR, Nasmyth K (2002).  
1090 Evidence that the Ipl1-Sli5 (Aurora kinase-INCENP) complex promotes chromosome bi-  
1091 orientation by altering kinetochore-spindle pole connections. *Cell* 108, 317–329.  
1092
- 1093 Tanaka, T., Desai, A. (2008). “Kinetochore-Microtubule Interactions: The Means to the End” *Curr*  
1094 *Opin Cell Biol*. 20(1) pp. 53-63 DOI: 10.1016/j.ceb.2007.11.005  
1095
- 1096 Tanenbaum, M., Vale, R., McKenney, R. “Cytoplasmic dynein crosslinks and slides anti-parallel  
1097 microtubules using its two motor domains.” *eLife* 2Le00945. DOI: 10.7554/eLife.00943.

1098  
1099 Telzer, D., Moses, M., Rosenbaum, J. (1975) “Assembly of microtubules onto kinetochores of  
1100 isolated mitotic chromosomes of HeLa cells”, *72*(10), pp. 4023-4027. doi:  
1101 10.1073/pnas.72.10.4023.  
1102  
1103 Tipton, A., Gorbsky, G. (2021) “More than Two Populations of Microtubules Comprise the  
1104 Dynamic Mitotic Spindle”, *biorxiv*.  
1105  
1106 Touati SA, Wassmann K. 2016. How oocytes try to get it right: spindle checkpoint control in  
1107 meiosis. *Chromosoma* **125**, 321-335. (10.1007/s00412-015-0536-7)  
1108  
1109 Warren JD, Orr B, Compton DA (2020) “A comparative analysis of methods to measure  
1110 kinetochore-microtubule attachment stability.” *Methods Cell Biol.* 158 pp.91-116. doi:  
1111 10.1016/bs.mcb.2020.01.004.  
1112  
1113 Waters, J., Mitchinson, T., Rieder, C., Salmon, E (1996). “The kinetochore microtubule minus end  
1114 disassembly associated with poleward flux produces a force that can do work”, *Mol Biol Cell* *7*(10)  
1115 pp. 1547–1558. DOI: 10.1091/mbc.7.10.1547  
1116  
1117 Wijeratne, S., Subramanian, R. “ Geometry of antiparallel microtubule bundles regulates relative  
1118 sliding and stalling by PRC1 and Kif4A”. *eLife* *7*: e32595. DOI: 10.7554/eLife.32595.  
1119  
1120 Witt, P., Ris, H., Borisy, G. (1980). “Origin of kinetochore microtubules in Chinese hamster ovary  
1121 cells” *Chromosoma* *81*(3), pp. 483-505. doi: 10.1007/BF00368158.  
1122  
1123 Wu, H-Y., Nazockdast, E., Shelley, M., Needleman, D. (2016). “Forces positioning the mitotic  
1124 spindle: Theories, and now experiments.” *Bioessays.* *38*(1600212). DOI:  
1125 10.1002/bies.201600212.  
1126  
1127 Yang, G., Cameron, L., Maddow, P., Salmon, E., Danuser, G. (2008). “Regional variation of  
1128 microtubule flux reveals microtubule organization in the metaphase meiotic spindle”, *J Cell Biol,*  
1129 *182*(4), pp. 631-639. DOI: 10.1083/jcb.200801105.  
1130  
1131 Yu, C-H., Redemann, S., Yu, H-Y., Kiewisz, R., Yoo, T., Conway, W., Farhadifar, R., Müller-  
1132 Reichert, T., Needleman, D. „Central-spindle microtubules are strongly  
1133 coupled to chromosomes during both anaphase A and anaphase B.” *Mol Biol Cell.* *30* pp. 2503-  
1134 2514. DOI: 10.1091/mbc.E19-01-0074.  
1135  
1136 Zhai, Y., Kronebusch, P., Borisy, G. (1995) “Kinetochore Microtubule Dynamics and the  
1137 Metaphase-Anaphase Transition”, *J Cell Biol,* *131*(3), pp. 721-734. DOI: 10.1083/jcb.131.3.721  
1138

## 1139 **Appendix 1: Computational Modeling Supplement**

1140

1141 Here, we describe the details of the analysis, biophysical modeling, and simulations we  
1142 performed to connect the structure of individual microtubules measured by electron tomography  
1143 to the dynamics we observed in the photoconversion experiment. We first define the geometry of  
1144 the simulated spindles. We then describe the details of the minus end speed prediction  
1145 calculation and the simulation.

1146

### 1147 **Simulation spindle geometry**

1148 To generate idealized versions of each of the three reconstructed spindles for the  
1149 simulations, we first separately fit each of the three spindles that were reconstructed by electron  
1150 microscopy (EM) to an ellipse (Figure 6s1). We then fit the position and size of  $m=1$  liquid  
1151 crystal defects to the director fields of each spindle with tangential anchoring at the elliptical  
1152 boundary (see Methods). In the simulations, we considered the motion of photoconverted tubulin  
1153 along discrete nematic streamlines. We placed these streamlines  $0.5\mu\text{m}$  apart at the center of the  
1154 spindle along the radial axis (Figure A1). We found the trajectories of the streamlines by  
1155 integrating along the director field predicted by a nematic model with tangential anchoring along  
1156 the elliptical boundary and  $m=1$  defects at the poles.

1157

### 1158 **Measuring the minus end density distribution $n(s)$ from the EM reconstructed spindles**

1159 To measure the minus end density distribution  $n(s)$  along streamlines, we first found the  
1160 position of every kinetochore microtubule (KMT) minus end along the fit nematic streamlines in  
1161 each of the three EM reconstructions. For each KMT minus end, we found the streamline it was  
1162 on by integrating along the fit nematic director field of that reconstructed spindle from the minus  
1163 end's position to the pole (Figure 6A). We then calculated the distance  $s$  between the KMT's  
1164 minus end position and the pole along this streamline, with  $s = 0$  for minus ends at the pole. A  
1165 density histogram constructed by binning together all minus ends positions with respect to  $s$   
1166 reflect two distinct effects: 1) variations of KMT minus end positions along  $s$  within a k-fiber; 2)  
1167 variations of the number of k-fibers along  $s$ . We wished to study the former, not the latter, so we  
1168 focused on an alternative distribution: the density distribution of KMT minus ends along  
1169 streamlines whose plus ends were upstream of that position. To construct that distribution, we  
1170 first calculated the density of minus ends in a small bin within  $0.1\mu\text{m}$  of the pole along the  
1171 streamline trajectories. To find the density of the minus ends in the next  $0.1\mu\text{m}$  bin upstream, we  
1172 multiplied the KMT density in the first bin by the ratio of the number of KMT minus ends in the  
1173 second bin with plus ends more than  $500\text{nm}$  upstream from the second bin to the number of  
1174 KMT minus ends in the first bin with plus ends more than  $500\text{nm}$  upstream from the second bin.  
1175 We then iterated this procedure along the streamline trajectory to produce the density distribution  
1176 of KMT minus end along streamlines whose plus ends were upstream of that position (Figure  
1177 6B).

1178

### 1179 **Deriving mass conservation equation for KMT minus ends to calculate the KMT minus end** 1180 **speed $v(s)$**



1181 We performed a mass-conservation flux analysis on the KMT minus end density  
1182 distribution (measured from the EM reconstructions) to predict the speed of the KMT minus ends  
1183 throughout the spindle (Figure 6C). We assumed that the KMTs in metaphase are in steady state  
1184 and move along streamlines, which implies that the fluxes associated with KMT gain, motion  
1185 and loss must balance at every position along the streamlines. We considered a region along a  
1186 streamline between positions  $s$  and  $s + ds$ , and defined the fluxes associated with KMT minus  
1187 end gain, motion and loss in this region as:

1188 1. **Gain:** New KMTs join the fiber with their minus ends at position  $s$  along streamlines  
1189 at rate  $j(s)$ . The form of  $j(s)$  depends on the choice of a model for how KMTs are  
1190 recruited to the kinetochore and is discussed in more detail below.

1191 2. **Motion:** KMT minus ends move into the region with flux  $v(s + ds) n(s + ds)$  and  
1192 move out of the region with flux  $v(s) n(s)$ , where  $n(s)$  is the density of KMT minus  
1193 ends at position  $s$ , and  $v(s)$  is the speed of KMT minus ends at position  $s$ . Subtracting  
1194 these terms and taking the limit  $ds \rightarrow 0$  gives the motion flux as  $v(s) \frac{dn}{ds} + \frac{dv}{ds} n(s)$ .

1195 3. **Loss:** KMTs detach from the kinetochore and depolymerize at rate  $r$ . Our  
1196 photoconversion experiments revealed that the lifetime of KMTs was independent of  
1197 their position in the spindle bulk (Figure 3G), so we took  $r$  to be constant (i.e.  
1198 independent of  $s$ ). We set  $r$  to be the inverse of the average lifetime of KMTs in the  
1199 spindle bulk measured in the photoconversion experiments: i.e.,  $r = 0.4 \text{ min}^{-1}$

1200 Since the KMT minus ends are in steady state, these three fluxes must sum to zero everywhere.  
1201 This gives us a steady state mass conservation equation:

$$1202 \quad j(s) + v(s) \frac{dn}{ds} + \frac{dv}{ds} n(s) - rn(s) = 0 \quad (\text{A1})$$

1203  
1204  
1205 *Defining the  $j(s)$  gain flux term*

1206 The form of the  $j(s)$  gain flux term depends on the KMT recruitment model (Figure 6D). If all  
1207 KMTs result from de novo nucleation at kinetochores (i.e., the nucleate at kinetochore model),  
1208 then, by assumption,  $j(s) = 0$  at all locations in the spindle bulk. Alternatively, if KMTs result  
1209 from non-KMTs that bind the kinetochore (i.e., the capture from spindle model), then  $j(s) \neq 0$ .  
1210 For a non-KMT to bind a kinetochore, it must first be nucleated and then grow far enough to  
1211 contact a kinetochore. Non-KMTs turnover in  $\sim 0.25$  min and move at a speed of  $\sim 1 \mu\text{m}/\text{min}$   
1212 (Figure 3), so we estimate that they travel only  $\sim 0.25 \mu\text{m}$  before depolymerizing. Thus, since  
1213 non-KMTs are not expected to significantly move over their lifetime, we take the inferred  
1214 density of non-KMT minus ends along streamlines,  $n_{NK}(s)$  (Figure 6s2), as an estimate of the  
1215 non-KMT nucleation rate along streamlines. The length distribution of non-KMTs is observed to  
1216 be exponential, with a mean length of  $l_{NK} = 1.9 \pm 0.1 \mu\text{m}$  (Figure A2). Thus, if a non-KMT  
1217 nucleates at position  $s$  along a streamline, the probabilities that it grows far enough to reach a  
1218 kinetochore located at position  $s_0$  is proportional to  $e^{-\frac{(s_0-s)}{l_{NK}}}$ . Taken together, this leads to  $j(s) \propto$   
1219  $n_{NK}(s)e^{\frac{s}{l_{NK}}}$  for the capture from spindle model, where the dependence on the position of the  
1220 kinetochore is absorbed into the constant of proportionality.

1221

1222 *Integrating the mass conservation equation (A1) to find minus end speed predictions*

1223 We set a no-flux boundary at the pole to integrate the mass conservation equation (A1).  
1224 The no-flux condition at the pole implies that either  $n(0) = 0$  or  $v(0) = 0$ , reducing the mass  
1225 conservation equation to:

$$1226 \quad n(0 + ds)v(0 + ds) - r n(0) = 0 \quad (A2)$$

1228  
1229  $n(0) = 0$  therefore requires that  $n(0 + ds) v(0 + ds) = 0$  which reproduces the no-flux  
1230 boundary condition at the position  $ds$ . Iterating this procedure produces a trivial solution that  
1231  $n(s) = 0$  everywhere. Since we observed a non-zero minus end distribution, we used the  $v(0) =$   
1232  $0$  condition instead. Using this  $v(0) = 0$  condition we integrated equation (1) numerically to  
1233 find the KMT minus end speed predictions from the nucleate at kinetochore and capture from  
1234 spindle recruitment models (Figure 6E).

### 1235 1236 **Simulated 2D confocal imaging of a photoconverted line**

1237 We simulated the motion of tubulin after photoconversion in both KMTs and non-KMTs  
1238 and the reincorporation of depolymerized tubulin in the simulation spindle for each of the three  
1239 reconstructed cells (Figure A1). We assumed that the dynamics were the same along all  
1240 streamlines and simulated the motion of photoconverted tubulin in KMTs and in non-KMTs  
1241 along a streamline. We calculated the tubulin profile along the spindle axis from each streamline  
1242 and then combined the results from the different streamlines. We finally added a background  
1243 profile from depolymerized photoconverted tubulin that reincorporated throughout the spindle to  
1244 produce a final line profile for analysis.

### 1245 1246 *KMTs*

1247 We simulated the gain, motion, and loss of individual KMTs along streamlines at discrete  
1248 timesteps. At each simulation timestep, we generated newly recruited KMTs with Poisson  
1249 statistics. The KMT plus end positions were selected from the distribution of kinetochores along  
1250 streamlines (Fig 7S1). For kinetochore nucleated KMTs, the minus ends started at the same  
1251 location as the plus end. For spindle captured KMTs, the minus ends position was drawn from  
1252 the probability that a microtubule would nucleate times the probably it would reach the  
1253 kinetochore ( $j(s) \propto n_{NK}(s)e^{\frac{s}{NK}}$ ). Newly incorporated tubulin polymerized at the KMT plus  
1254 ends while the minus ends move backwards along the streamline towards the pole with an  
1255 experimentally inferred speed  $v(s)$ . In the spindle bulk, the minus ends moved at the same speed  
1256 that the tubulin incorporated at the plus end. When KMT minus ends entered the pole region, at  
1257  $s_p = 1.5\mu m$  upstream from the pole, tubulin continued to polymerize at the same rate as at the  
1258 boundary, but the minus ends began to depolymerize at speed  $v_{tread}(s) = [v(s_p) -$   
1259  $v(s)]\theta(s_p - s)$ , where  $\theta(s)$  is the Heavyside step function. The tubulin in a KMT therefore  
1260 moved at speed  $v_{tub}(s) = v(s) + v_{tread}(s)$  while the minus ends moved at the experimentally  
1261 inferred speed  $v(s)$ . After an exponential drawn lifetime with mean  $1/r = 1/0.4 \text{ min} =$   
1262 2.5 min, the KMTs detach from the kinetochore and are removed from the simulation.

1263 To simulate the motion of photoconverted tubulin, we calculated the intensity of the  
1264 photoconverted tubulin along streamlines with a modified Cauchy profile  $I(x) = \frac{1}{1 + \left(\frac{x-x_0}{w}\right)^a}$ .

1265 Based on fits to the experimental line profile immediately after photoconversion, we set  $a = 1.7$   
1266 and  $w = 400\text{nm}$  (Figure 7s2). The KMTs were pre-equilibrated for 20 minutes of simulation  
1267 time before the simulation line was drawn to ensure the KMTs were in steady state. We  
1268 projected the simulated photoconverted tubulin intensity along the spindle axis and summed the  
1269 contribution of each KMTs along each of the spindle streamlines to produce a KMT line profile.  
1270

#### 1271 *Non-KMTs*

1272 For the non-KMTs, we calculated the initial intensity of photoconverted tubulin along a  
1273 streamline by multiplying the density of non-KMTs along the streamline by a Cauchy intensity  
1274 profile along the spindle axis. We then translated the entire profile along the streamline towards  
1275 the pole at a uniform speed equal to the speed of KMT minus ends where the line was drawn  
1276  $v(s)$ . The profile height decayed at a rate  $r_{NK} = 4\text{min}^{-1}$  measured in the photoconversion  
1277 experiment (Figure 3H). Changing the simulated speed of the non-KMTs did not significantly  
1278 impact the measured speed of the KMTs after the final analysis (Figure A3). Like the KMTs, we  
1279 simulated the motion of the peak along each streamline, projected onto the spindle axis and then  
1280 summed the streamlines together to produce a line profile. We added the KMT and non-KMT  
1281 profile together, normalizing the profiles so that the KMT to non-KMT intensity ratio was 4:1.  
1282

#### 1283 *Reincorporated Background*

1284 Finally, we included the contribution of reincorporated tubulin from photomarked  
1285 microtubules that depolymerized. We modeled the background as a constant tubulin profile  
1286 whose height exponentially approached a plateau value  $h(t) = A * [1 - e^{-\frac{t}{\tau_{bkgd}}}]$ . We  
1287 determined the profile of reincorporated tubulin background from the average profile of tubulin  
1288 along the spindle axis in cells with an mCherry:alpha-tubulin marker. (Figure A4). The height  
1289 and timescale of the background profile were found using the photoconverted tubulin signal at  
1290 the opposite pole in the photoconversion experiments. We fit a Gaussian to the photoconverted  
1291 tubulin profile at the opposite pole. We then fit the height of the peak over time to determine the  
1292 height and timescale of the background profile (Figure A5). The background incorporation took  
1293  $\tau_{bkgd} = 80\text{s}$  and leveled off to  $A = 3\%$  of the height of the original peak.  
1294

#### 1295 *Fitting the motion and decay of the simulated peak*

1296 We summed the contribution of the KMTs, non-KMTs and background together and then  
1297 convolved the line profile with a Gaussian with width 250nm to simulate the microscope point  
1298 spread function. We then processed our simulated curves through the same algorithm we used to  
1299 fit the experimental curves (see Methods): fit the pixels near the top of the peak to a Gaussian, fit  
1300 the center of the Gaussian to a line to determine the velocity, fit the height of the Gaussian  
1301 corrected for background to a dual-exponential to determine KMT and non-KMT stability.  
1302

#### 1303 *Error Analysis*

1304 We repeated the simulations for each of the three EM-reconstructions. We used the measured  
1305 KMT minus end distribution and spindle geometry from each individual spindle. We took the  
1306 mean of the predictions from the three cells to find the model predicted speed of the  
1307 photoconverted line (Figure 7B). We then took the standard error of the mean for the speed  
1308 predictions from all three spindles to find the error in our model predictions.

1309

### 1310 **3D Spindle Simulations**

1311 We simulated the gain, motion, and loss of discrete KMTs in each of the three  
1312 reconstructed cells in 3D. At each timestep, we nucleated new KMTs at kinetochores by placing  
1313 both the plus and the minus end at the same position within 200nm of the position of a  
1314 kinetochore in the reconstruction. We then moved the minus ends of the existing KMTs towards  
1315 the pole at the experimentally inferred speed  $v(s)$  along nematic streamlines in 3D. The nematic  
1316 streamline for each KMT were found by calculating the 2D nematic streamline from the plus end  
1317 position in the spindle-radial axis plane and rotating the spindle-radial axis plane about the  
1318 spindle axis to the kinetochore position. This procedure produced a 3D streamline that was flat in  
1319 the theta direction. When the KMT minus ends cross the pole boundary at  $s_p = 1.5\mu\text{m}$  from the  
1320 pole along a streamline, the minus ends begin to depolymerize causing tubulin to treadmill  
1321 through the spindle at a speed  $v_{tread}(s) = [v(s_p) - v(s)]\theta(s_p - s)$ , as in the 2D case. The  
1322 KMTs detach from the kinetochore at a rate  $r = 0.4\text{min}^{-1}$  and are removed from the simulation.

1323 We compared the predicted lengths, orientations, and dynamics of the simulated and  
1324 experimentally measured KMTs. We measured the lengths of the simulated KMTs from the  
1325 distance between the plus and the minus end along the streamline trajectory. To compare the  
1326 orientations of the simulated and reconstructed KMTs, we divided each KMT into short 100nm  
1327 subsections and projected the subsections onto the spindle axis. We compared the fraction of the  
1328 100nm subsection lengths along the spindle axis in the simulation and experiment. We drew a  
1329 plane of photoactivation tubulin perpendicular to the spindle axis with a Cauchy profile. We  
1330 projected the tubulin intensity in a thin  $1\mu\text{m}$  confocal z-slice onto the spindle axis to produce a  
1331 line profile. The center position, width, and exponent of the profile were fit to a sample  
1332 photoconverted line profile at  $t=0$  min. We then tracked the converted tubulin in the spindle over  
1333 60s of simulated time and reprojected the confocal slice onto the spindle axis to compare the line  
1334 profile with experimental converted line profile at  $t=60$ s.

1335

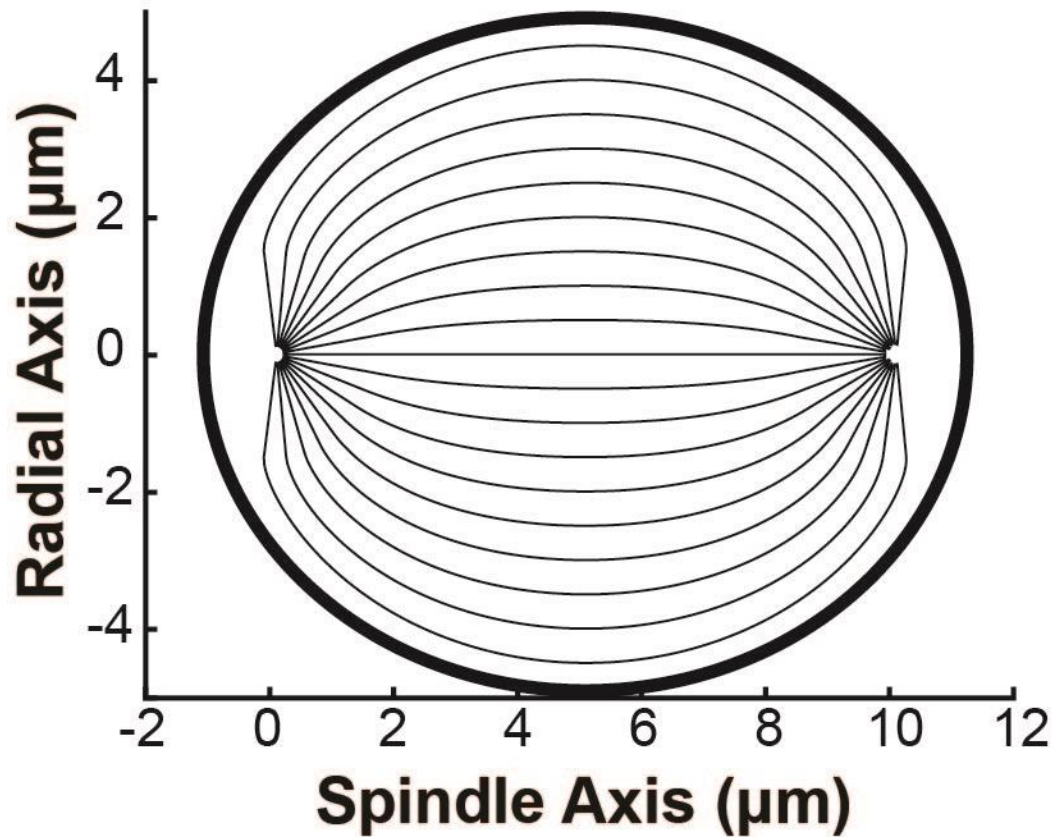

1336

1337 **Figure A1: Sample geometry of spindle streamlines used in the simulation.** Geometry of the  
1338 spindle streamlines used in the simulations. The thin lines show the trajectories of nematic  
1339 streamlines in the spindle bulk. The thick black line shows the elliptical boundary of the spindle.

1340

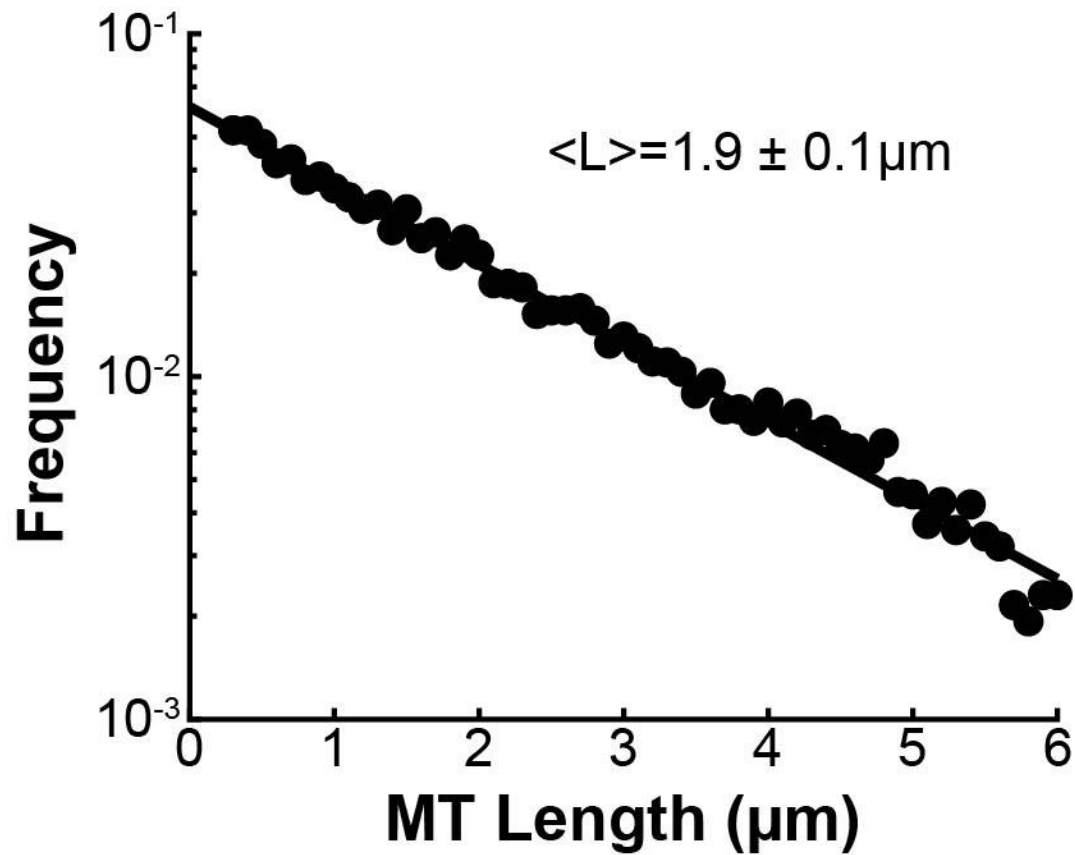

1341  
1342 **Figure A2: Length distribution of non-KMTs in the spindle.** Binned histogram of the lengths  
1343 of non-KMTs in three reconstructed mitotic HeLa spindle. Black dots: electron microscopy data;  
1344 black line: exponential fit. Mean MT length is  $1.9 \pm 0.1 \mu\text{m}$ .

1345  
1346

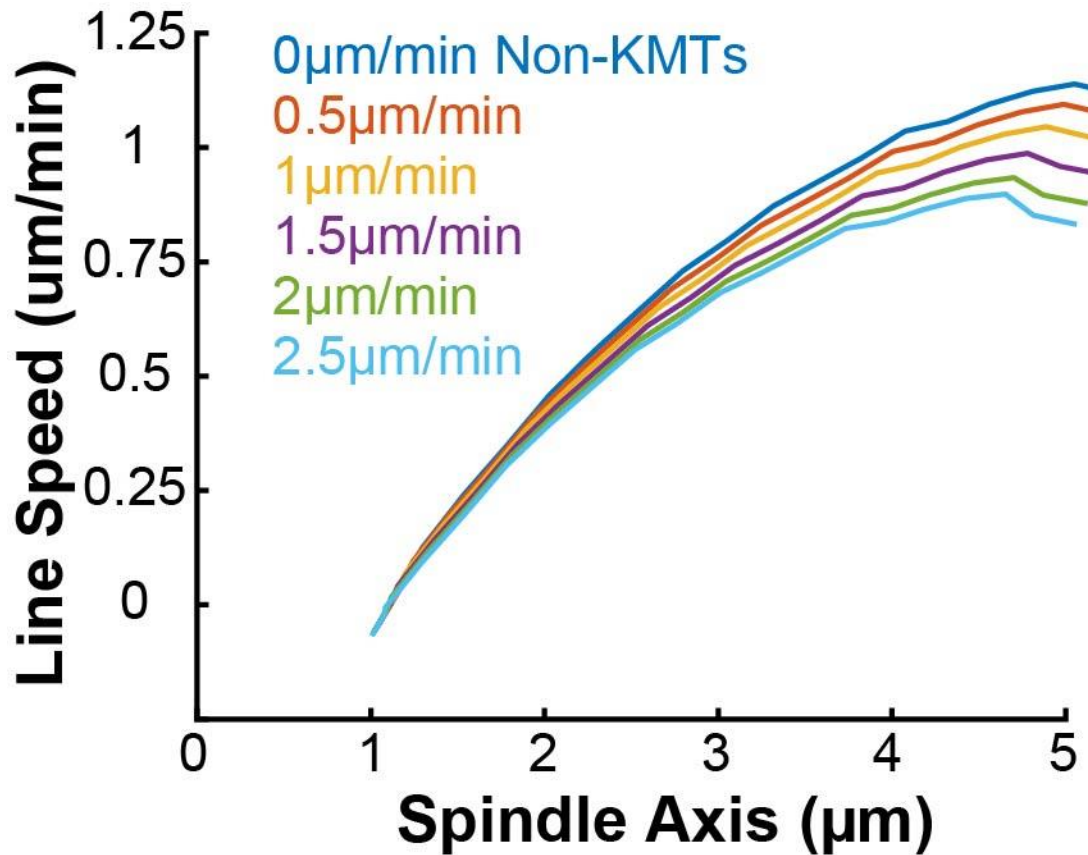

1347  
1348 **Figure A3: Predicted photoconverted line speed for various uniform non-KMT motion**  
1349 **speeds.** The speed of the non-KMTs was varied (assorted colors) in 0.5um/min increments in a  
1350 2D confocal imaging spindle simulation.  
1351

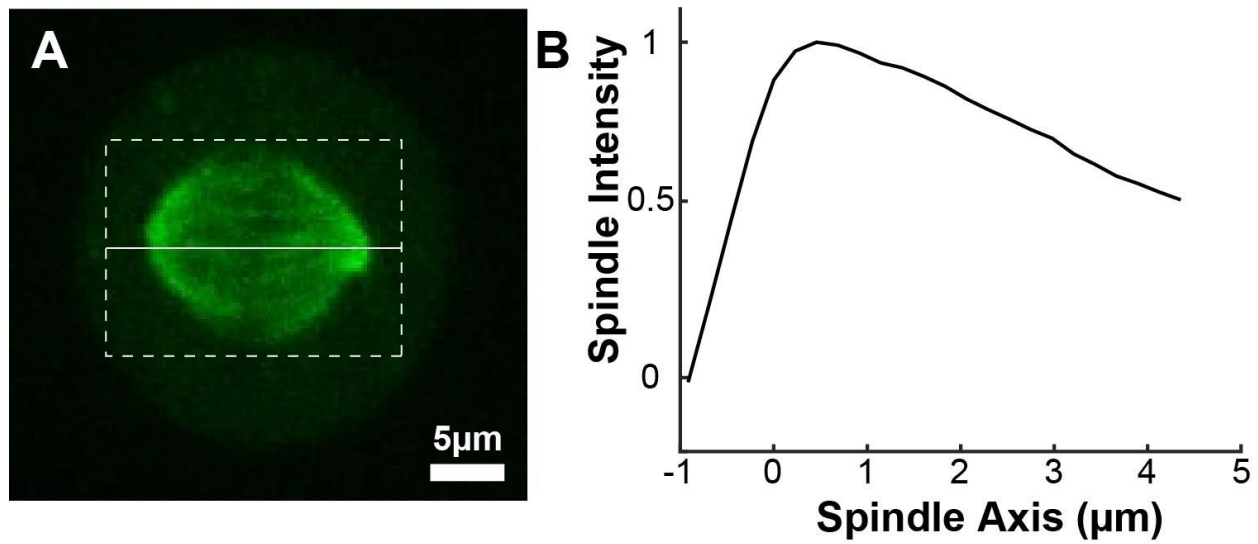

1352  
1353  
1354  
1355  
1356

**Figure A4: Spindle background profile.** A) Sample representative spindle image (Green: mCherry:tubulin). B) The intensity of the tubulin marker projected onto the spindle axis and then averaged for  $n=72$  half spindles. The spindle axis  $x=0$  is located at the pole.



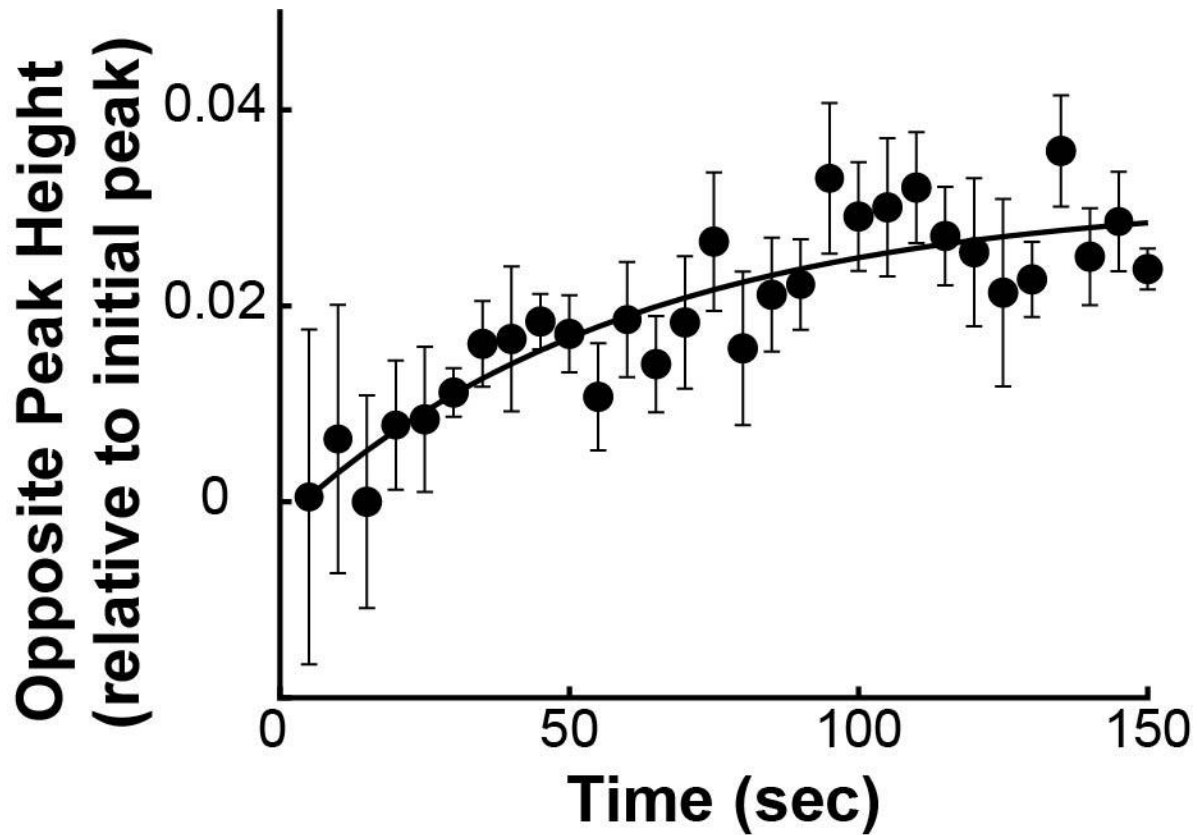

1357  
1358  
1359  
1360

**Figure A5: Height of the opposite pole over time.** The peak height averaged from n=5 spindles displaying a clear opposite peak (black dots) is fit to an exponential (black line).

| Simulation Parameter               | Value                  | Source                                 |
|------------------------------------|------------------------|----------------------------------------|
| KMT Trajectories, $t(s)$           | -                      | Nematic Theory (Figure 5 and. 6A)      |
| KMT Velocity $v(s)$                | Varies                 | Mass Conservation Analysis (Figure 6E) |
| KMT Stability, $r$                 | $0.4 \text{ min}^{-1}$ | Photoconversion (Figure 3G)            |
| Non-KMT Mean Length, $l_{NK}$      | $1.9 \mu\text{m}$      | Electron Microscopy (Figure A2)        |
| Photoconverted Line Width, $w$     | 400 nm                 | Converted Line Profile (Figure 7s2)    |
| Line Cauchy Exponent, $a$          | 1.7                    | Converted Line Profile (Figure 7s2)    |
| Background Height, $h_{bgd}$       | 0.03                   | Opposite Peak Height (Figure A5)       |
| Background Rise Time, $\tau_{bgd}$ | 80s                    | Opposite Peak Height (Figure A5)       |

1361 **Table A6: Parameters values and sources**

1362
